# Supplementary material for: Phenotype-Specific Therapeutic Effect of Rhodiola wallichiana var. cholaensis Combined with Dexamethasone on Experimental Murine Asthma and Its Comprehensive Pharmacological Mechanism
Source: PubMed Central journal article supplement (PMC6747379; doi:10.3390/ijms20174216), 2019-08-28
Supplement: ijms-20-04216-s001.pdf [file ijms-20-04216-s001.pdf]

## Phenotype-specific Therapeutic Effect of *Rhodiola wallichiana* var. *cholaensis* Combined with Dexamethasone on Murine Asthma and Its Comprehensive Pharmacological Mechanism

Zhiqiang Pang<sup>1</sup>, Nan Ran<sup>1</sup>, Yuze Yuan<sup>1</sup>, Cuizhu Wang<sup>1,2</sup>, Guoqiang Wang<sup>1</sup>, Hongqiang Lin<sup>2</sup>, Alan Chen-Yu Hsu<sup>3</sup>, Jinping Liu<sup>2</sup> and Fang Wang<sup>1,4\*</sup>

\* Correspondence: wf@jlu.edu.cn; Tel.: +86-431-85649509 (F.W.)

**Table S1.** Chromatographic Gradient Condition Parameters

| Time Points | Mobile Phase A/% | Mobile Phase B/% | Flow Rate (mL/min) |
|-------------|------------------|------------------|--------------------|
| 0.01min     | 9                | 91               | 0.5                |
| 24min       | 20               | 80               | 0.5                |
| 42min       | 22               | 78               | 0.7                |
| 60min       | 30               | 70               | 1.0                |
| 60.01min    | 9                | 91               | 1.0                |
| 75min       | 9                | 91               | 1.0                |

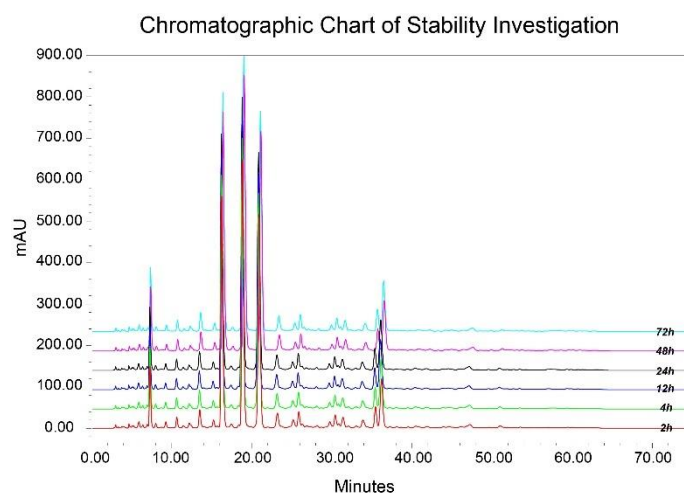

**Figure S1.** Chromatographic chart of the stability investigation at different time points (including 2h, 4h, 12h, 24h, 48h and 72h).

**Table S2.** Results of the Investigation on Stability

| Time Points | Retention Time | Peak area | Percentage of Peak Area (%) | Peak Hight |
|-------------|----------------|-----------|-----------------------------|------------|
| 2h          | 16.26          | 9354284   | 20.40                       | 558902     |
| 4h          | 16.22          | 9431619   | 20.33                       | 562594     |
| 12h         | 16.19          | 9405484   | 20.43                       | 563594     |
| 24h         | 16.22          | 9512479   | 20.34                       | 568769     |
| 48h         | 16.42          | 9328926   | 20.26                       | 554830     |
| 72h         | 16.39          | 9603952   | 20.18                       | 566178     |
| Average     | 16.28          | 9439457.3 | 20.32                       | 562477.83  |
| RSD%        | 0.60           | 1.1       | 0.45                        | 0.89       |

Supplementary Materials

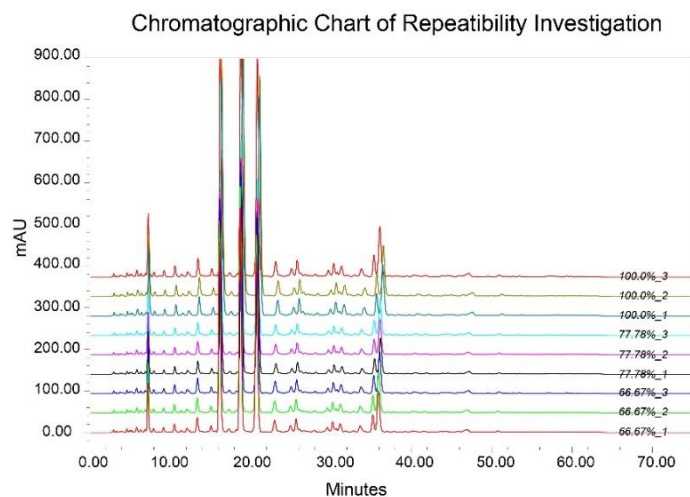

Figure S2. Chromatographic chart of the repeatability investigation at different relative concentrations (including 66.67%, 77.78% and 100%).

Table S3. Results of the Investigation on Repeatability

| NO. | Percentage of Conc | Times | Retention Time | Peak area | Percentage of Peak Area | Peak Hight |
|-----|--------------------|-------|----------------|-----------|-------------------------|------------|
|     | 66.67%             | 1     | 16.25          | 6569928   | 20.10                   | 401205     |
|     |                    | 2     | 16.23          | 6513661   | 20.03                   | 399665     |
|     |                    | 3     | 16.23          | 6453186   | 20.06                   | 396129     |
|     | Average            |       | 16.2           | 6512258.3 | 20.1                    | 398999.7   |
|     | RSD%               |       | 0.06           | 0.90      | 0.18                    | 0.65       |
|     | 77.78%             | 1     | 16.14          | 7464159   | 20.17                   | 455557     |
|     |                    | 2     | 16.13          | 7520086   | 19.99                   | 458753     |
|     |                    | 3     | 16.17          | 7693697   | 20.08                   | 467769     |
|     | Average            |       | 16.1           | 7559314.0 | 20.1                    | 460693.0   |
|     | RSD%               |       | 0.14           | 1.58      | 0.45                    | 1.37       |
|     | 100%               | 1     | 16.39          | 9703952   | 20.18                   | 576178     |
|     |                    | 2     | 16.42          | 9728926   | 20.26                   | 574830     |
|     |                    | 3     | 16.22          | 9512479   | 20.34                   | 568769     |
|     | Average            |       | 16.3           | 9648452.3 | 20.3                    | 573259.0   |
|     | RSD%               |       | 0.66           | 1.23      | 0.39                    | 0.69       |

Conc: concentration.

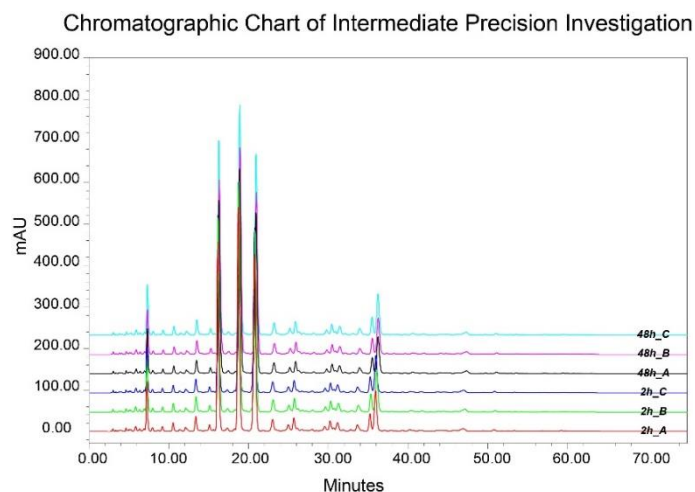

Figure S3. Chromatographic chart of the investigation on intermediate

Supplementary Materials

precision of testing samples of different operators (A/B/C) in different timepoints (2h and 48h).

**Table S4.** Results of the Investigation on Intermediate Precision

| Time    | NO. Operators | Retention Time | Peak area | Percentage of Peak Area | Peak Hight |
|---------|---------------|----------------|-----------|-------------------------|------------|
| 2h      | A             | 16.39          | 9603952   | 20.18                   | 569178     |
|         | B             | 16.22          | 9512479   | 20.34                   | 568769     |
|         | C             | 16.22          | 9431619   | 20.33                   | 562594     |
| 48h     | A             | 16.26          | 9239270   | 20.46                   | 547790     |
|         | B             | 16.25          | 9393182   | 20.14                   | 553898     |
|         | C             | 16.26          | 9148635   | 20.41                   | 541054     |
| Average |               | 16.27          | 9388189.5 | 20.31                   | 557213.83  |
| RSD%    |               | 0.40           | 1.8       | 0.62                    | 2.07       |

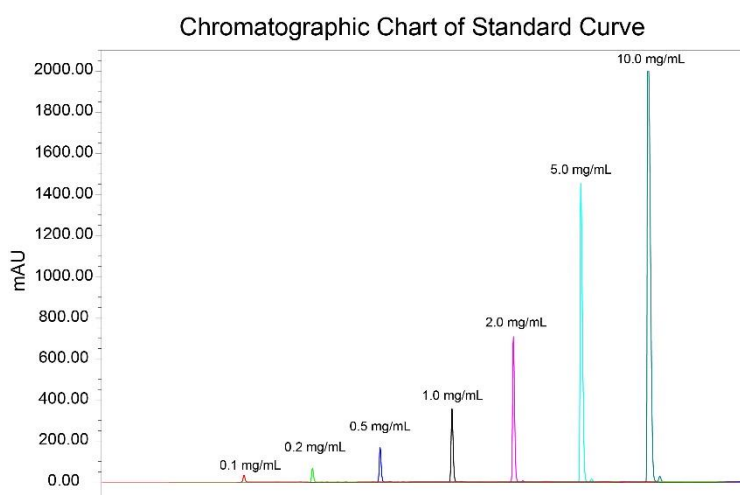

**Figure S4.** Chromatographic chart of the investigation on the linear at different concentrations (0.1, 0.2, 0.5, 1.0, 2.0, 5.0 and 10.0mg/mL).

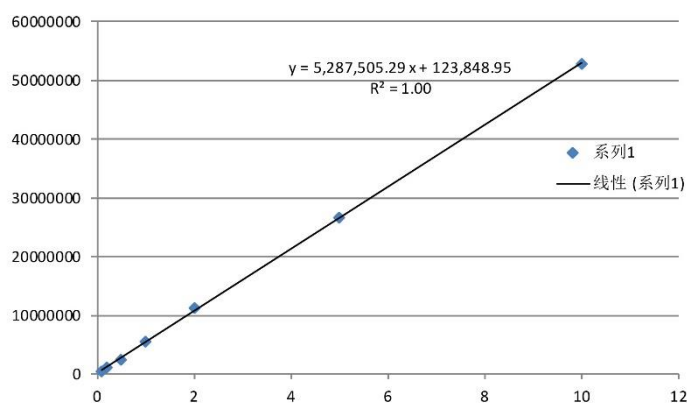

**Figure S5.** Regression equation of the investigation on the linearity at different concentrations (0.1, 0.2, 0.5, 1.0, 2.0, 5.0 and 10.0mg/mL).

Supplementary Materials

**Table S5** Results of the Investigation on Linear

| NO_Conc(mg/mL) | A_0.1 | B_0.2  | C_0.5   | D_1.0   | E_2.0   | F_5.0    | G_10.0   |          |
|----------------|-------|--------|---------|---------|---------|----------|----------|----------|
| PA             | 1     | 526321 | 1038457 | 2575931 | 5580350 | 11010583 | 26625171 | 53270040 |
|                | 2     | 519505 | 1045373 | 2583733 | 5581070 | 11304394 | 26493581 | 52841399 |
|                | 3     | 520110 | 1028414 | 2325293 | 5368352 | 11357070 | 26688486 | 52532493 |
|                | A     | 521978 | 1037414 | 2494985 | 5509924 | 11224015 | 26602412 | 52881310 |
| PH             | 1     | 35542  | 69036   | 169454  | 357465  | 711548   | 1454640  | 2004293  |
|                | 2     | 35152  | 69415   | 169702  | 353777  | 709279   | 1449428  | 2003690  |
|                | 3     | 34892  | 68002   | 152866  | 346635  | 710000   | 1453506  | 2004218  |
|                | A     | 35195  | 68818   | 164007  | 352626  | 710276   | 1452525  | 2004067  |

PA: Peak Area; PH: Peak Height; A: Average; Conc: Concentration.

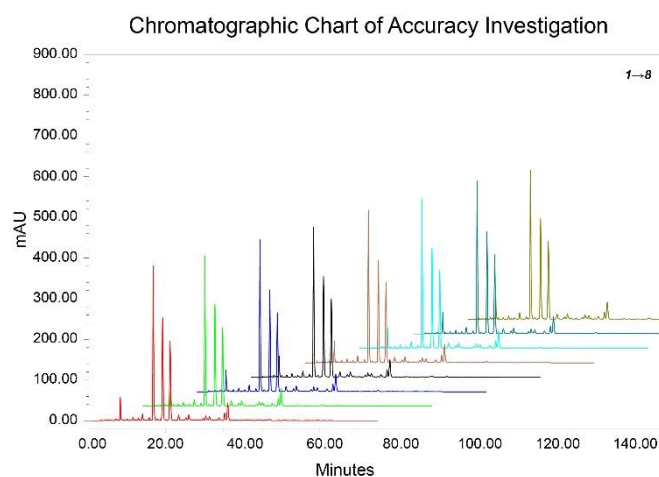

**Figure S6.** Chromatographic chart of the investigation on the accuracy based on Ratio of Recovery.

**Table S6.** Results of the Investigation on Accuracy

| NO.     | Retention Time | Peak area | Percentage of Peak Area (%) | Peak Hight | Concentration(mg/mL) | Ratio of Recovery (%) |
|---------|----------------|-----------|-----------------------------|------------|----------------------|-----------------------|
| 1       | 16.30          | 5939234   | 30.59                       | 366492     | 1.10                 | 99.17                 |
| 2       | 16.50          | 5908688   | 31.24                       | 375670     | 1.09                 | 98.01                 |
| 3       | 16.23          | 5897949   | 31.26                       | 366193     | 1.09                 | 97.61                 |
| 4       | 16.40          | 5898729   | 31.44                       | 375312     | 1.09                 | 97.63                 |
| 5       | 16.19          | 5924084   | 31.26                       | 367832     | 1.10                 | 98.59                 |
| 6       | 16.33          | 5937088   | 31.39                       | 373332     | 1.10                 | 99.09                 |
| 7       | 16.09          | 5898992   | 31.14                       | 369059     | 1.09                 | 97.64                 |
| 8       | 16.71          | 5936974   | 31.33                       | 381407     | 1.10                 | 99.08                 |
| Average | 16.35          | 5917717.3 | 31.2                        | 371912.1   | 1.1                  | 98.4                  |
| RSD%    | 1.19           | 0.3       | 0.9                         | 1.5        | 0.3                  | 0.7                   |

Supplementary Materials

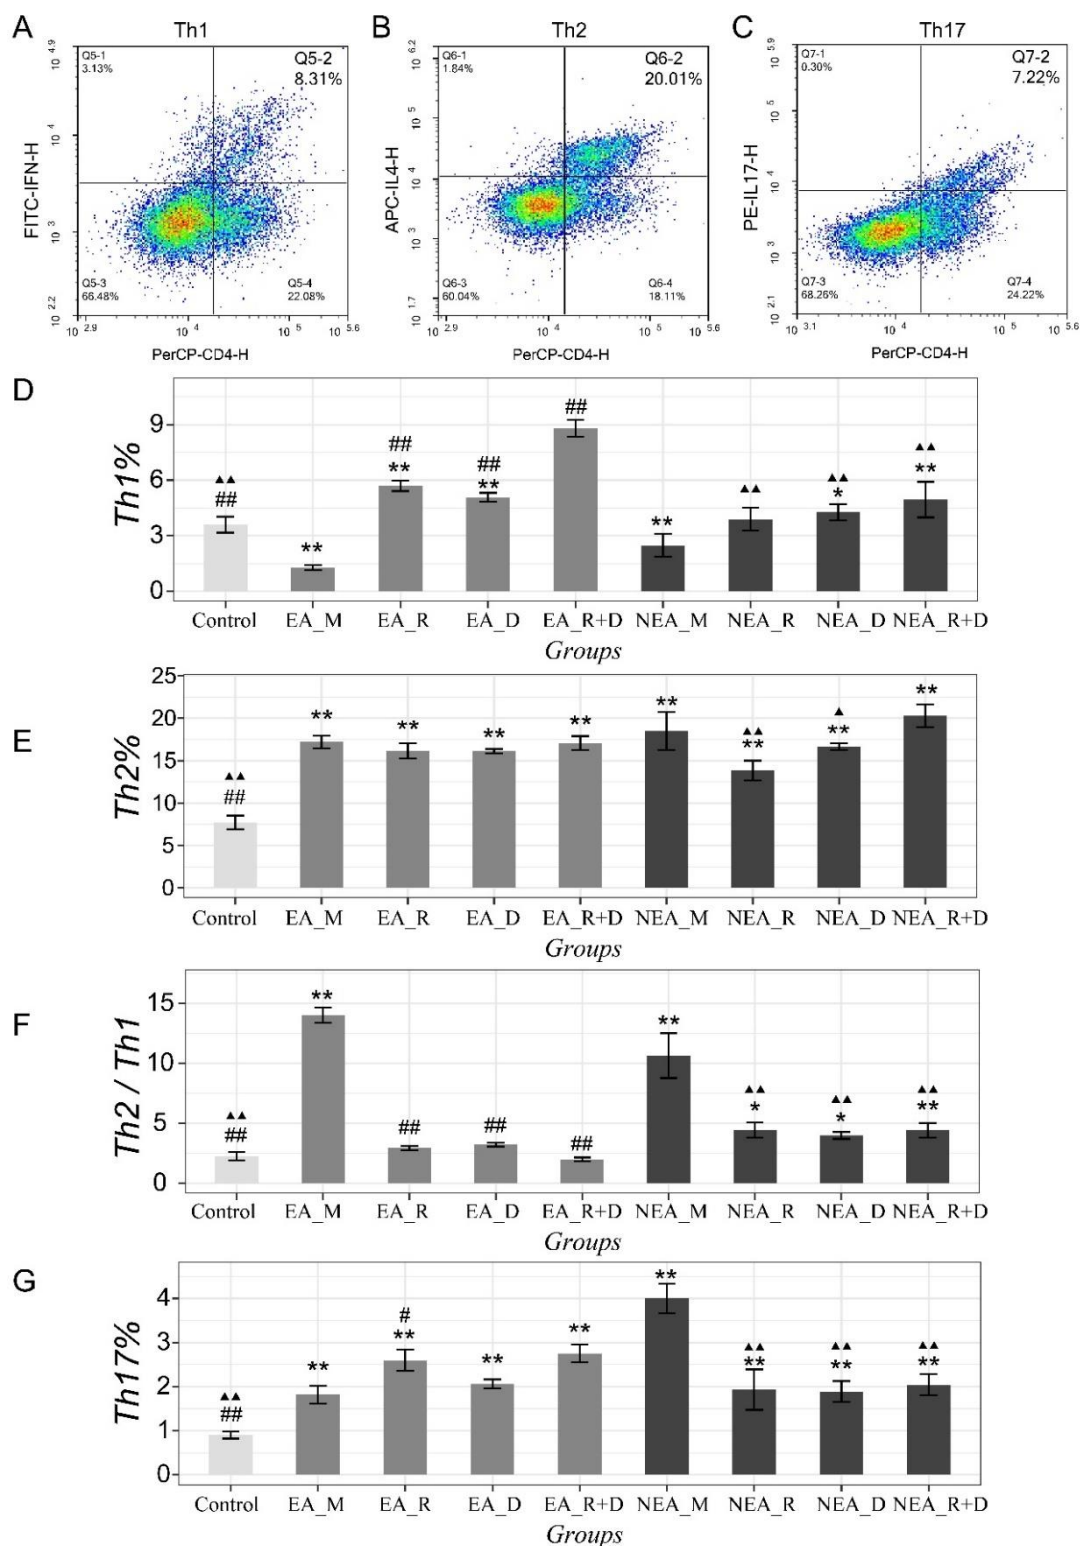

**Figure S7.** Typical flow cytometry dot plots of helper T cell clusters (including Th1/Th2/Th17, from one of the samples of all groups). (A) Th1 (CD4+IFN- $\gamma$ ) in spleen tissue; (B) Th2 (CD4+IL-4+) in spleen tissue; (C) Th17 (CD4+IL-7+) in spleen tissue. The statistical data of Th1 cells (D) Th2 cells (E) Th2/Th1 ratio (F) and Th17 cells (G) in mice spleen tissues with flowcytometry technique. \*  $p < 0.05$  vs. HC; \*\*  $p < 0.01$  vs. HC; ##  $p < 0.01$  vs. EA; #  $p < 0.05$  vs. EA; ▲▲  $p < 0.01$  vs. NEA.

Supplementary Materials

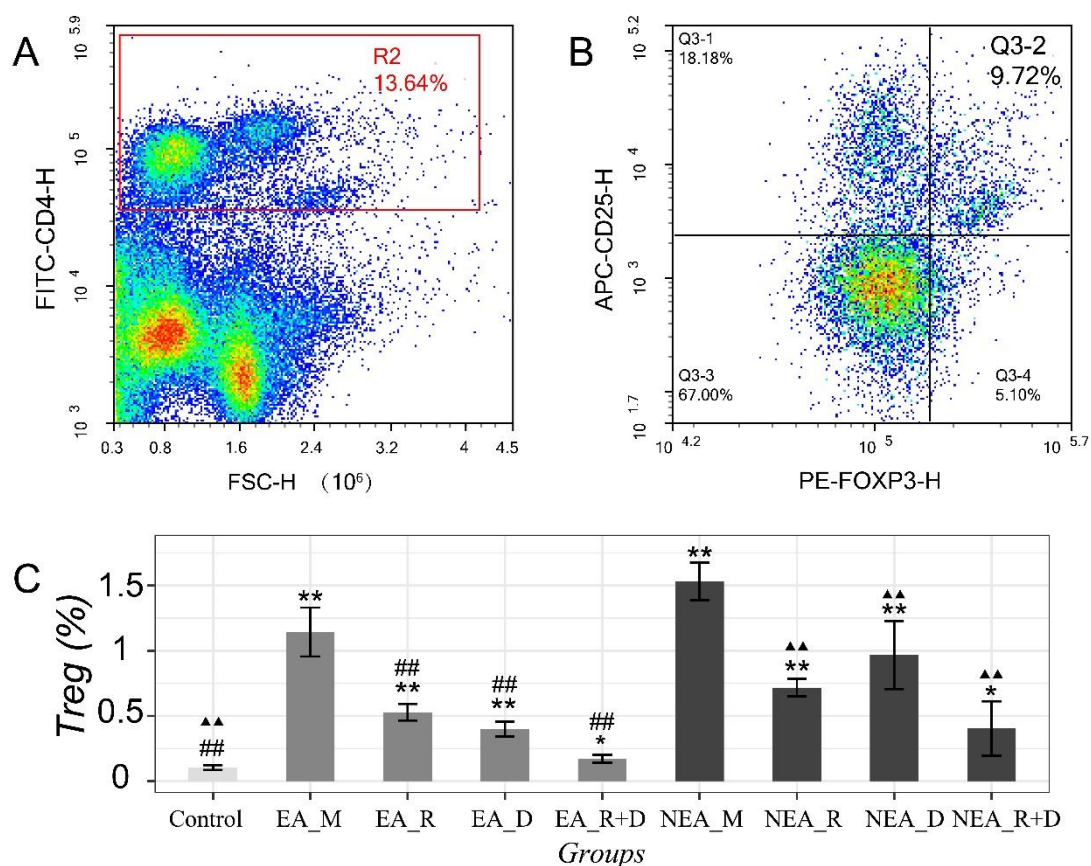

**Figure S8.** Typical flow cytometry dot plots of regulatory T cell clusters. (A) CD4 positive and negative cells in spleen; (B) Treg cells (CD4<sup>+</sup>-CD25<sup>+</sup>-Foxp3<sup>+</sup>) in spleen. The statistical data of Tregs (C) in mice spleen tissues with flowcytometry technique. \*  $p < 0.05$  vs. HC; \*\*  $p < 0.01$  vs. HC; ##  $p < 0.01$  vs. EA; #  $p < 0.05$  vs. EA; ▲  $p < 0.05$  vs. NEA; ▲▲  $p < 0.01$  vs. NEA.

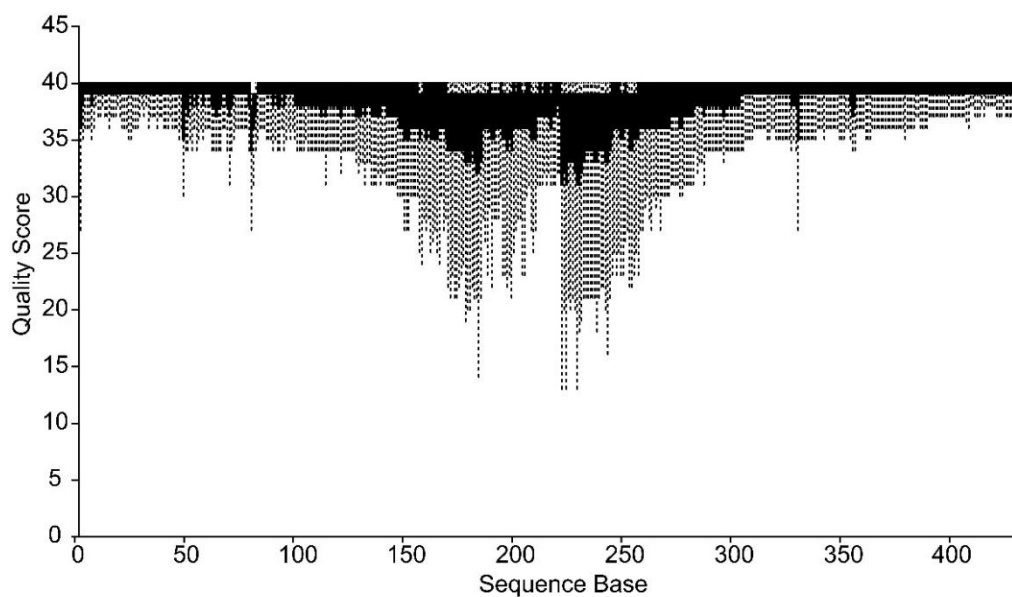

**Figure S9.** Statistical results of sequencing data from Hiseq sequencing platform after filtering. Quality score is the QC index.

Supplementary Materials

Table S7. Statistic Results of OBS Index with Kruskal-Wallis (Pairwise)

| Group 1       | Group 2   | H           | P-value  | Q-value  |
|---------------|-----------|-------------|----------|----------|
| Control (n=8) | EA (n=6)  | 7.4105      | 0.006484 | 0.035663 |
| Control (n=8) | ED (n=6)  | 9.6211      | 0.000923 | 0.013224 |
| Control (n=8) | ER (n=8)  | 9.6211      | 0.001923 | 0.013224 |
| Control (n=8) | EDR (n=8) | 9.6211      | 0.001923 | 0.013224 |
| Control (n=8) | NEA (n=8) | 7.4105      | 0.006484 | 0.035663 |
| Control (n=8) | ND (n=8)  | 9.7808      | 0.001763 | 0.013224 |
| Control (n=8) | NR (n=8)  | 10.5187     | 0.001181 | 0.013224 |
| Control (n=8) | NDR(n=7)  | 9.6211      | 0.001923 | 0.013224 |
| ED (n=6)      | ND (n=8)  | 8.5918      | 0.002124 | 0.035663 |
| EDR (n=8)     | ND (n=8)  | 4           | 0.045500 | 0.192501 |
| ER (n=8)      | ND (n=8)  | 5.224489796 | 0.022270 | 0.111354 |
| ER (n=8)      | NDR (n=7) | 3.448979592 | 0.063290 | 0.248642 |

Table S8. Statistic Results of Shannon Index with Kruskal-Wallis (Pairwise)

| Group 1       | Group 2   | H        | P-value  | Q-value  |
|---------------|-----------|----------|----------|----------|
| Control (n=8) | EA (n=6)  | 5.653846 | 0.017417 | 0.079829 |
| Control (n=8) | ED (n=6)  | 9.6      | 0.001946 | 0.015288 |
| Control (n=8) | ER (n=6)  | 9.6      | 0.001946 | 0.015288 |
| Control (n=8) | EDR (n=6) | 9.6      | 0.001946 | 0.015288 |
| Control (n=8) | NEA (n=6) | 8.066667 | 0.004509 | 0.030997 |
| Control (n=8) | ND (n=8)  | 10.5     | 0.001194 | 0.015288 |
| Control (n=8) | NR (n=8)  | 10.5     | 0.001194 | 0.015288 |
| Control (n=8) | NDR (n=7) | 7.384615 | 0.006578 | 0.040201 |
| ED (n=6)      | ND (n=8)  | 3.44898  | 0.033291 | 0.219723 |
| ER (n=8)      | ND (n=8)  | 5.897959 | 0.015158 | 0.075792 |
| EDR (n=8)     | ND (n=8)  | 6.612245 | 0.010128 | 0.055704 |
| ND (n=8)      | NDR (n=7) | 3.571429 | 0.048782 | 0.219723 |

Table S9. Statistic Results of Pielou Evenness Index with Kruskal-Wallis (Pairwise)

| Group 1       | Group 2   | H      | P-value  | Q-value |
|---------------|-----------|--------|----------|---------|
| Control (n=8) | ED (n=6)  | 9.6    | 0.001945 | 0.01783 |
| Control (n=8) | EDR (n=8) | 9.6    | 0.001945 | 0.01783 |
| Control (n=8) | ER (n=8)  | 8.0666 | 0.004508 | 0.03099 |
| Control (n=8) | ND (n=8)  | 10.5   | 0.001193 | 0.01783 |
| Control (n=8) | NDR (n=7) | 10.5   | 0.001193 | 0.01783 |
| Control (n=8) | NEA (n=8) | 7.3846 | 0.006578 | 0.04020 |
| Control (n=8) | NR (n=8)  | 9.0535 | 0.002621 | 0.02060 |
| EDR (n=8)     | ND (n=8)  | 5.2244 | 0.022270 | 0.12249 |

Table S10. Statistic Results of Faith PD Index with Kruskal-Wallis (Pairwise)

| Group 1       | Group 2   | H       | P-value | Q-value |
|---------------|-----------|---------|---------|---------|
| Control (n=8) | EA (n=6)  | 4.875   | 0.02724 | 0.13945 |
| Control (n=8) | ED (n=6)  | 9.6     | 0.00194 | 0.03567 |
| Control (n=8) | ER (n=8)  | 9.6     | 0.00194 | 0.03567 |
| Control (n=8) | EDR(n=8)  | 9.6     | 0.00194 | 0.03567 |
| Control (n=8) | NEA (n=8) | 8.06666 | 0.00450 | 0.04959 |
| Control (n=8) | ND (n=8)  | 4.83482 | 0.02789 | 0.13945 |
| Control (n=8) | NR (n=8)  | 6.48214 | 0.01089 | 0.07491 |
| Control (n=8) | NDR (n=7) | 8.06666 | 0.00450 | 0.04959 |
| EA (n=6)      | EDR (n=8) | 4.54545 | 0.03300 | 0.03567 |
| ED (n=6)      | EDR (n=8) | 5.02564 | 0.02497 | 0.03567 |
| ER (n=8)      | EDR (n=8) | 4.33333 | 0.03737 | 0.03567 |
| EDR (n=8)     | NEA (n=8) | 4.33333 | 0.03737 | 0.03567 |
| EDR (n=8)     | NDR (n=7) | 3.44897 | 0.04329 | 0.03567 |



Supplementary Materials

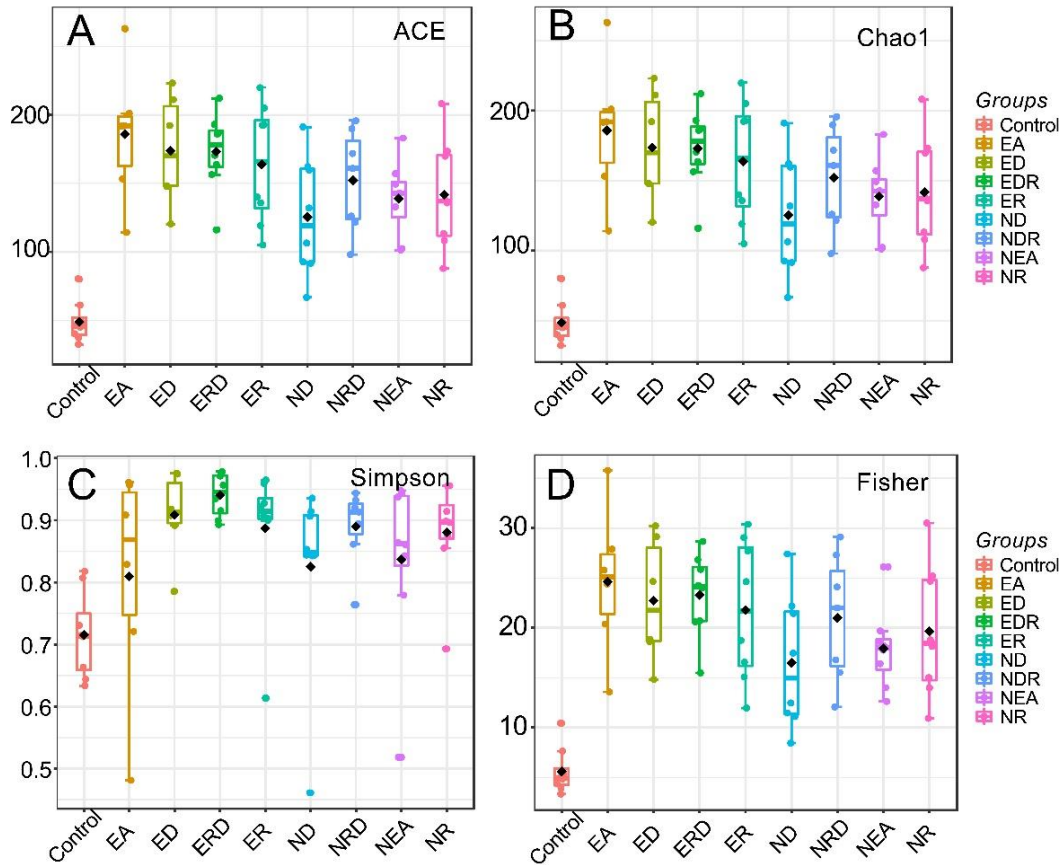

Figure S10. The box plots of  $\alpha$ -diversity indexes, including (A) ACE, (B) Chao1, (C) Simpson and (D) Fisher.

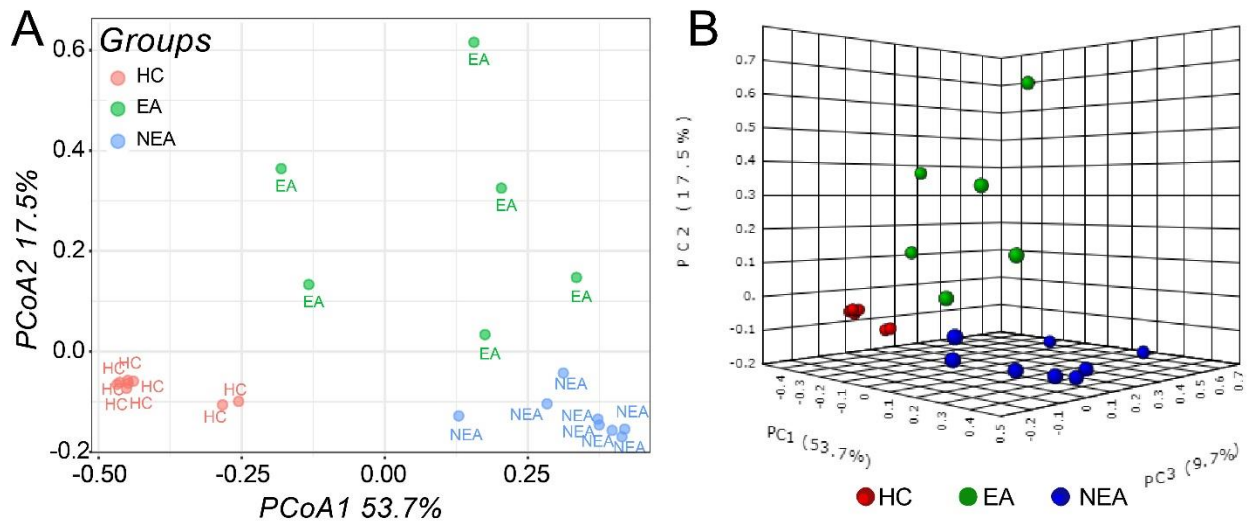

Figure S11. PCoA plots (PCoA1 = 53.7%, PCoA2 = 17.5%, PCoA3 = 9.7%) of Models and HC in (A) 2-dimension (2D) and in (B) 3-dimension (3D)



Supplementary Materials

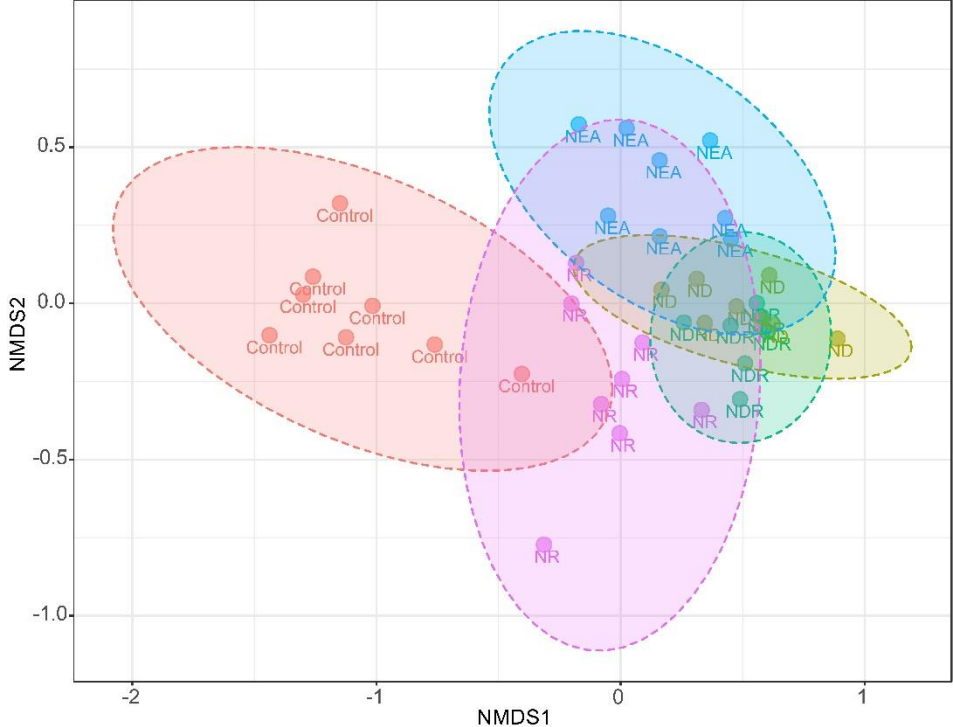

Figure S12. Results of NMDS  $\beta$ -Diversity Analysis (NEA Model and Therapeutic groups).

Supplementary Materials

**Table S11.** Results of different genera in Model group based on LEfse analysis

| <b>Genera</b>                | <b>P values</b> | <b>FDR</b> | <b>Control</b> | <b>EA</b> | <b>NEA</b> | <b>LDA score</b> |
|------------------------------|-----------------|------------|----------------|-----------|------------|------------------|
| <i>Rahnella</i>              | 8.97E-05        | 0.004811   | 0              | 3372.846  | 481880.7   | 5.38             |
| <i>Streptococcus</i>         | 9.13E-05        | 0.004811   | 5599.431       | 2516714   | 107289.7   | 6.10             |
| <i>Staphylococcus</i>        | 0.000144        | 0.004811   | 0              | 33216.3   | 69466.44   | 4.54             |
| <i>Bifidobacterium</i>       | 0.000229        | 0.004811   | 0              | 105499.2  | 64900.57   | 4.72             |
| <i>Sphingomonas</i>          | 0.000248        | 0.004811   | 3214017        | 519769.2  | 38825.21   | 6.20             |
| <i>Carnobacterium</i>        | 0.000281        | 0.004811   | 0              | 0         | 47642.94   | 4.38             |
| <i>Pseudomonas</i>           | 0.000281        | 0.004811   | 6025.886       | 83830.22  | 303817.3   | 5.17             |
| <i>Propionibacterium</i>     | 0.000405        | 0.005664   | 1856.995       | 85606.13  | 277306.1   | 5.14             |
| <i>Brevundimonas</i>         | 0.000539        | 0.005664   | 1646857        | 102183.5  | 23421.32   | 5.91             |
| <i>Delftia</i>               | 0.000567        | 0.005664   | 320903.2       | 43345.7   | 3359.552   | 5.20             |
| <i>Roseburia</i>             | 0.000799        | 0.006572   | 10337.09       | 43320.81  | 144692.1   | 4.83             |
| <i>Clostridium</i>           | 0.000829        | 0.006572   | 15630.79       | 367802.9  | 70113.77   | 5.25             |
| <i>Bacillus</i>              | 0.000902        | 0.006572   | 0              | 17483.3   | 24601.68   | 4.09             |
| <i>Bacteroides</i>           | 0.000953        | 0.006572   | 7665.216       | 116664.3  | 177567.8   | 4.93             |
| <i>Phyllobacterium</i>       | 0.001184        | 0.007029   | 3613293        | 1624600   | 976428.8   | 6.12             |
| <i>Gemmiger</i>              | 0.00126         | 0.007029   | 1388.58        | 17218.34  | 30388.74   | 4.16             |
| <i>Mitsuokella</i>           | 0.001269        | 0.007029   | 0              | 0         | 26087.57   | 4.12             |
| <i>Acinetobacter</i>         | 0.001334        | 0.007029   | 18522.74       | 95574.07  | 106862.8   | 4.65             |
| <i>Streptomyces</i>          | 0.001505        | 0.007222   | 121.7469       | 50847.43  | 21587.42   | 4.40             |
| <i>Blautia</i>               | 0.001515        | 0.007222   | 6954.13        | 39689.65  | 57164.88   | 4.40             |
| <i>Coprococcus</i>           | 0.001529        | 0.007222   | 2648.514       | 23727.02  | 47504.08   | 4.35             |
| <i>Enhydrobacter</i>         | 0.001584        | 0.007234   | 2496.748       | 58368.87  | 33664.13   | 4.45             |
| <i>Faecalibacterium</i>      | 0.001747        | 0.007324   | 8150.677       | 93842.84  | 102597.8   | 4.67             |
| <i>Weissella</i>             | 0.001819        | 0.007324   | 0              | 24933.22  | 3349.114   | 4.10             |
| <i>Methylobacterium</i>      | 0.001826        | 0.007324   | 3047.311       | 27097.8   | 17782.2    | 4.08             |
| <i>Kaistobacter</i>          | 0.001871        | 0.007324   | 7050.993       | 49704.91  | 2000.731   | 4.38             |
| <i>Dialister</i>             | 0.00212         | 0.007946   | 888.6914       | 6229.923  | 29728.92   | 4.16             |
| <i>Corynebacterium</i>       | 0.002313        | 0.007946   | 1811.961       | 31256.13  | 26036.99   | 4.17             |
| <i>Bradyrhizobium</i>        | 0.002314        | 0.007946   | 1907.687       | 41505.49  | 0          | 4.32             |
| <i>Candidatus_Koribacter</i> | 0.002354        | 0.007946   | 0              | 32236.42  | 4376.954   | 4.21             |
| <i>Proteus</i>               | 0.002624        | 0.00817    | 0              | 4272.26   | 125742.4   | 4.80             |
| <i>Mycoplana</i>             | 0.003277        | 0.009354   | 2388.358       | 28531.55  | 99986.1    | 4.69             |
| <i>Sutterella</i>            | 0.004083        | 0.010553   | 1518.467       | 4740.701  | 30444.51   | 4.16             |
| <i>Deinococcus</i>           | 0.004472        | 0.010906   | 121.7469       | 14938.29  | 24889.43   | 4.09             |
| <i>Gluconacetobacter</i>     | 0.004561        | 0.010906   | 0              | 2397.489  | 30990.22   | 4.19             |
| <i>Pelomonas</i>             | 0.004668        | 0.010906   | 79044.18       | 106858    | 9918.009   | 4.69             |
| <i>Trabulsiella</i>          | 0.004822        | 0.010906   | 0              | 3670.514  | 153269.4   | 4.88             |
| <i>Paracoccus</i>            | 0.005175        | 0.010906   | 2695.763       | 22820.96  | 29693.68   | 4.13             |
| <i>Succinivibrio</i>         | 0.005724        | 0.01181    | 444.3457       | 4084.27   | 154841.6   | 4.89             |
| <i>Ruminococcus</i>          | 0.006768        | 0.013635   | 18595.68       | 39567.63  | 110052.5   | 4.66             |
| <i>Megasphaera</i>           | 0.010504        | 0.019447   | 499.8889       | 684.8386  | 25416.4    | 4.10             |
| <i>Lactobacillus</i>         | 0.012897        | 0.023248   | 46703.44       | 244534.5  | 77310.82   | 5.00             |
| <i>Rhodoplanes</i>           | 0.01475         | 0.025259   | 4512.635       | 43625.9   | 21832.64   | 4.29             |
| <i>Lachnospira</i>           | 0.017683        | 0.029084   | 4534.365       | 15492.6   | 39541.43   | 4.24             |
| <i>Micrococcus</i>           | 0.031341        | 0.044727   | 1299.603       | 22712.04  | 19048.75   | 4.03             |

Supplementary Materials

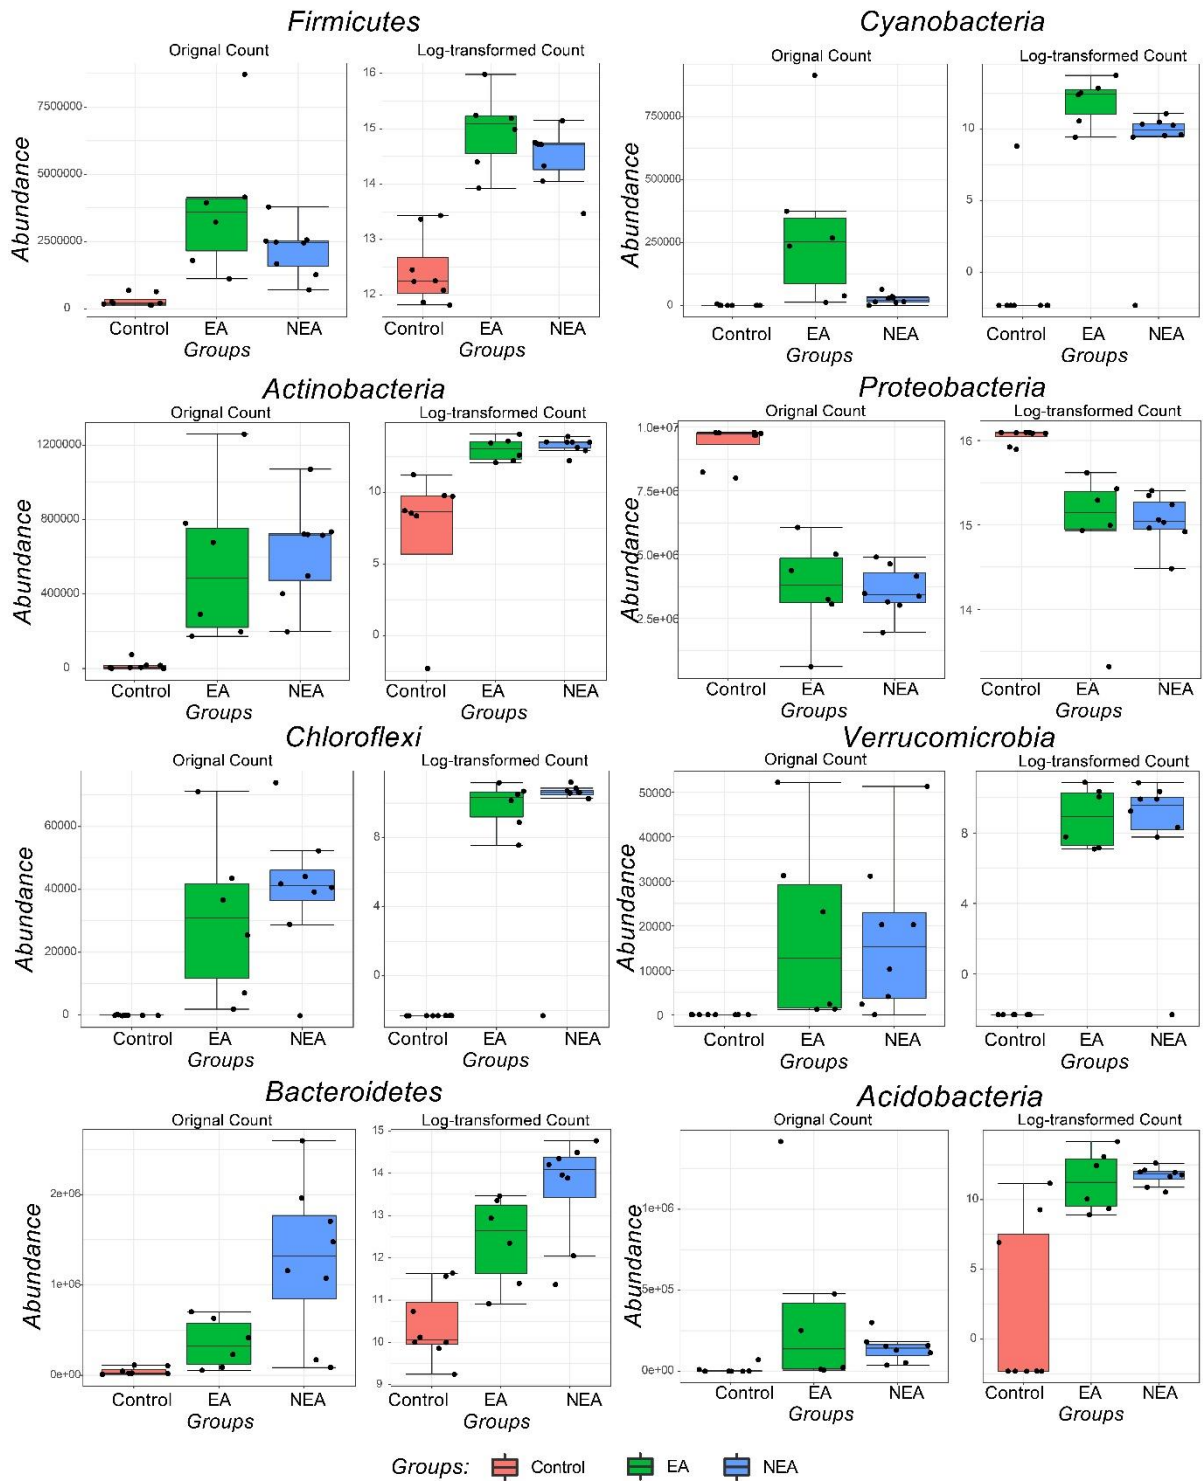

**Figure S13.** The statistical results of all distinct phyla in all model groups and control group, including the original counts and log-transformed data ( $p < 0.05$ ,  $LDA > 4$ ).

Supplementary Materials

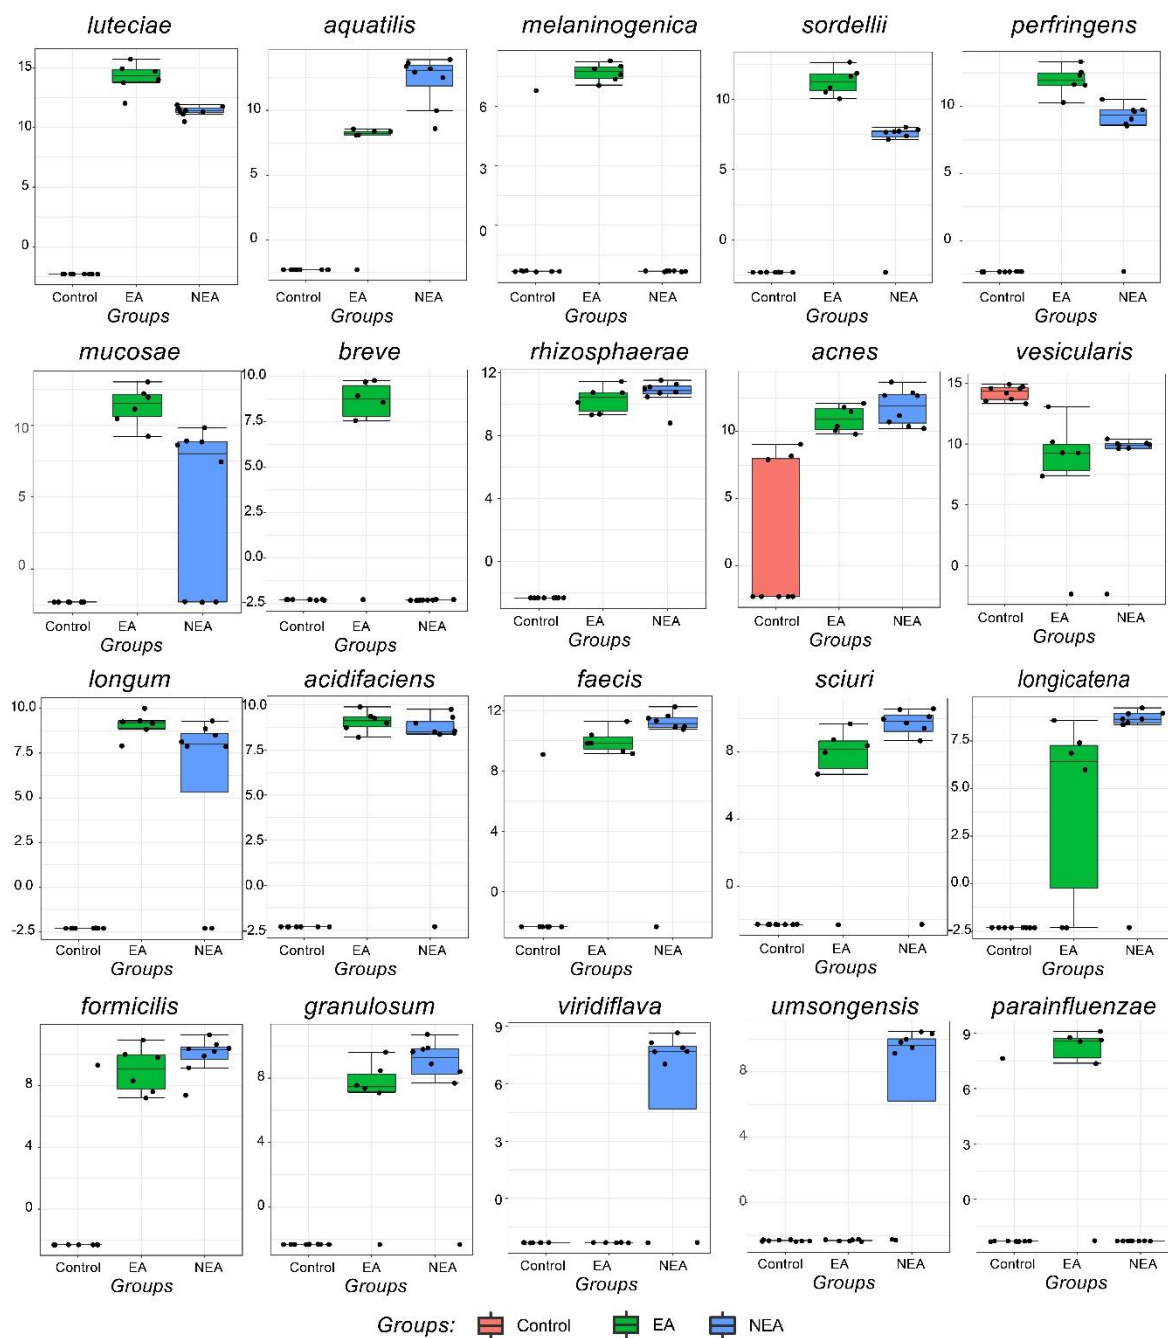

**Figure S14.** The log-transformed results of distinct species in model groups and control group ( $p < 0.05$ ,  $LDA > 4$ ). All genus species were abbreviated as species and illustrated as follows, *Streptococcus luteciae* (*luteciae*), *Rahnella aquatilis* (*aquatilis*), *Prevotella melaninogenica* (*melaninogenica*), *Clostridium sordellii* (*sordellii*), *Clostridium perfringens* (*perfringens*), *Lactobacillus mucosae* (*mucosae*), *Bifidobacterium breve* (*breve*), *Chryseobacterium rhizosphaerae* (*rhizosphaerae*), *Cutibacterium acnes* (*acnes*), *Brevundimonas vesicularis* (*vesicularis*), *Bifidobacterium longum* (*longum*), *Propionibacterium acidifaciens* (*acidifaciens*), *Bacteroides faecis* (*faecis*), *Staphylococcus sciuri* (*sciuri*), *Dorea longicatena* (*longicatena*), *Gemmiger formicilis* (*formicilis*), *Propionibacterium granulosum* (*granulosum*), *Pseudomonas viridiflava* (*viridiflava*), *Pseudomonas umsogensis* (*umsogensis*) and *Haemophilus parainfluenzae* (*parainfluenzae*).

Supplementary Materials

Table S12. Discrimination results on the stability and durability of the spectrometry and chromatography

| Mode | NO | RT/min  | m/z       | m/z                  |                  | RT                   |                  | PA                   |                  |
|------|----|---------|-----------|----------------------|------------------|----------------------|------------------|----------------------|------------------|
|      |    |         |           | Repeatability (RSD%) | Precision (RSD%) | Repeatability (RSD%) | Precision (RSD%) | Repeatability (RSD%) | Precision (RSD%) |
| ESI+ | 1  | 0.5788  | 201.6442  | 0.0006               | 0.0003           | 0.0012               | 0.0000           | 2.7081               | 5.2620           |
|      | 2  | 12.7089 | 274.2749  | 0.0000               | 0.0001           | 0.0001               | 0.0000           | 1.1709               | 4.6712           |
|      | 3  | 9.7526  | 338.3431  | 0.0001               | 0.0002           | 0.0215               | 0.1777           | 3.1600               | 2.9135           |
|      | 4  | 27.1474 | 429.2413  | 0.0001               | 0.0001           | 0.1037               | 0.0554           | 2.2565               | 3.1535           |
|      | 5  | 20.6052 | 524.3721  | 0.0002               | 0.0002           | 0.0052               | 0.0000           | 3.4421               | 5.1513           |
|      | 6  | 27.6191 | 613.3402  | 0.0001               | 0.0001           | 0.2473               | 0.6784           | 2.1183               | 5.7450           |
|      | 7  | 27.6164 | 701.3916  | 0.0000               | 0.0002           | 0.1245               | 0.6980           | 1.7551               | 3.8983           |
|      | 8  | 27.1398 | 803.5436  | 0.0000               | 0.0001           | 0.0120               | 0.0640           | 2.7071               | 5.7567           |
|      | 9  | 17.9762 | 953.7809  | 0.0004               | 0.0008           | 0.1020               | 0.0835           | 3.9924               | 2.3065           |
|      | 10 | 16.9942 | 1039.6735 | 0.0001               | 0.0004           | 0.0047               | 0.0882           | 1.6940               | 5.6129           |

m/z, Mass-to-charge Ratio; RT, Retention Time; PA, Peak Area. NO, Number of the selected ions.

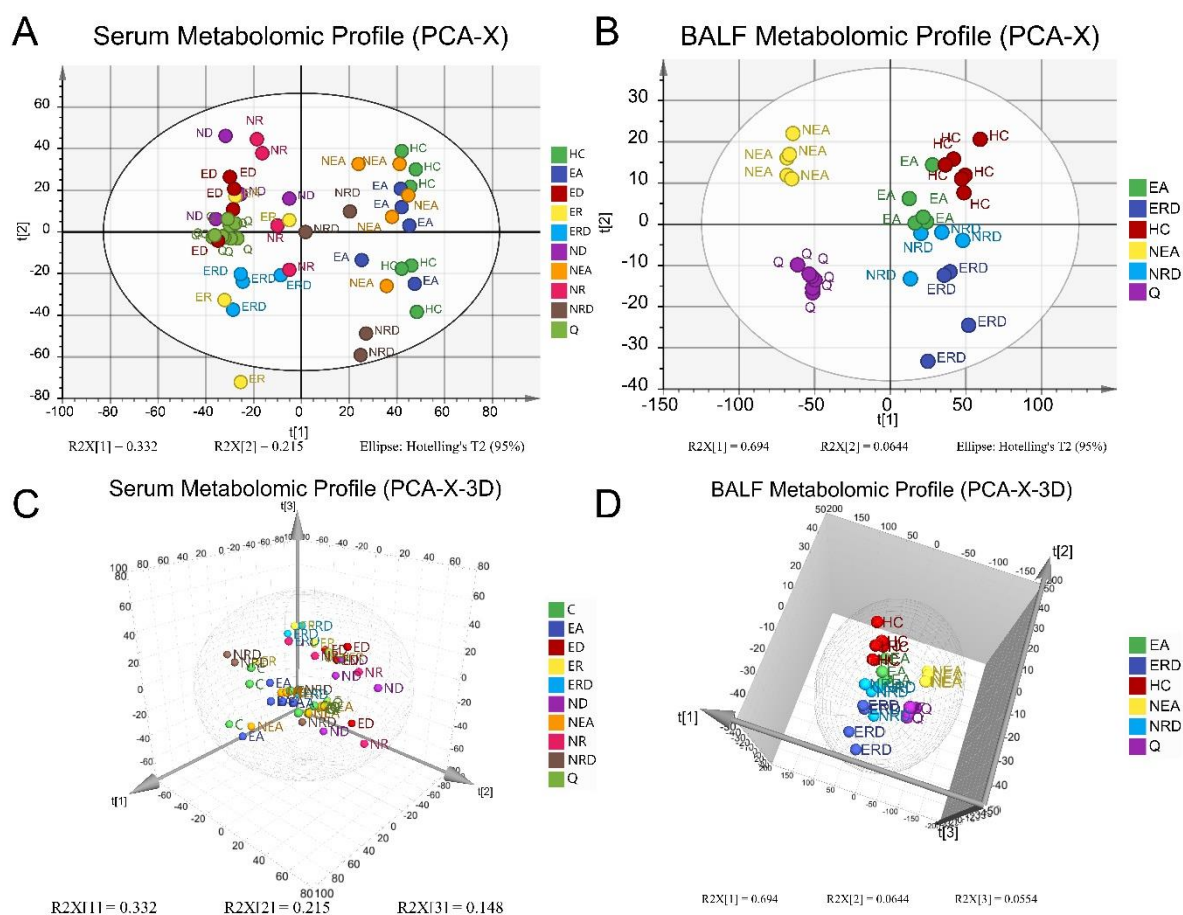

Figure S15. The principal component analysis (PCA) of (A) serum metabolomic profile ( $R^2X=0.921$ ,  $Q^2=0.712$ ,  $PCA1=33.2\%$ ,  $PCA2=21.5\%$ ) and its 3D diagram (C). PCA of (B) BALF metabolomic profile ( $R^2X=0.814$ ,  $Q^2=0.687$ ,  $PCA1=69.4\%$ ,  $PCA2=6.44\%$ ) and its 3D diagram (D).

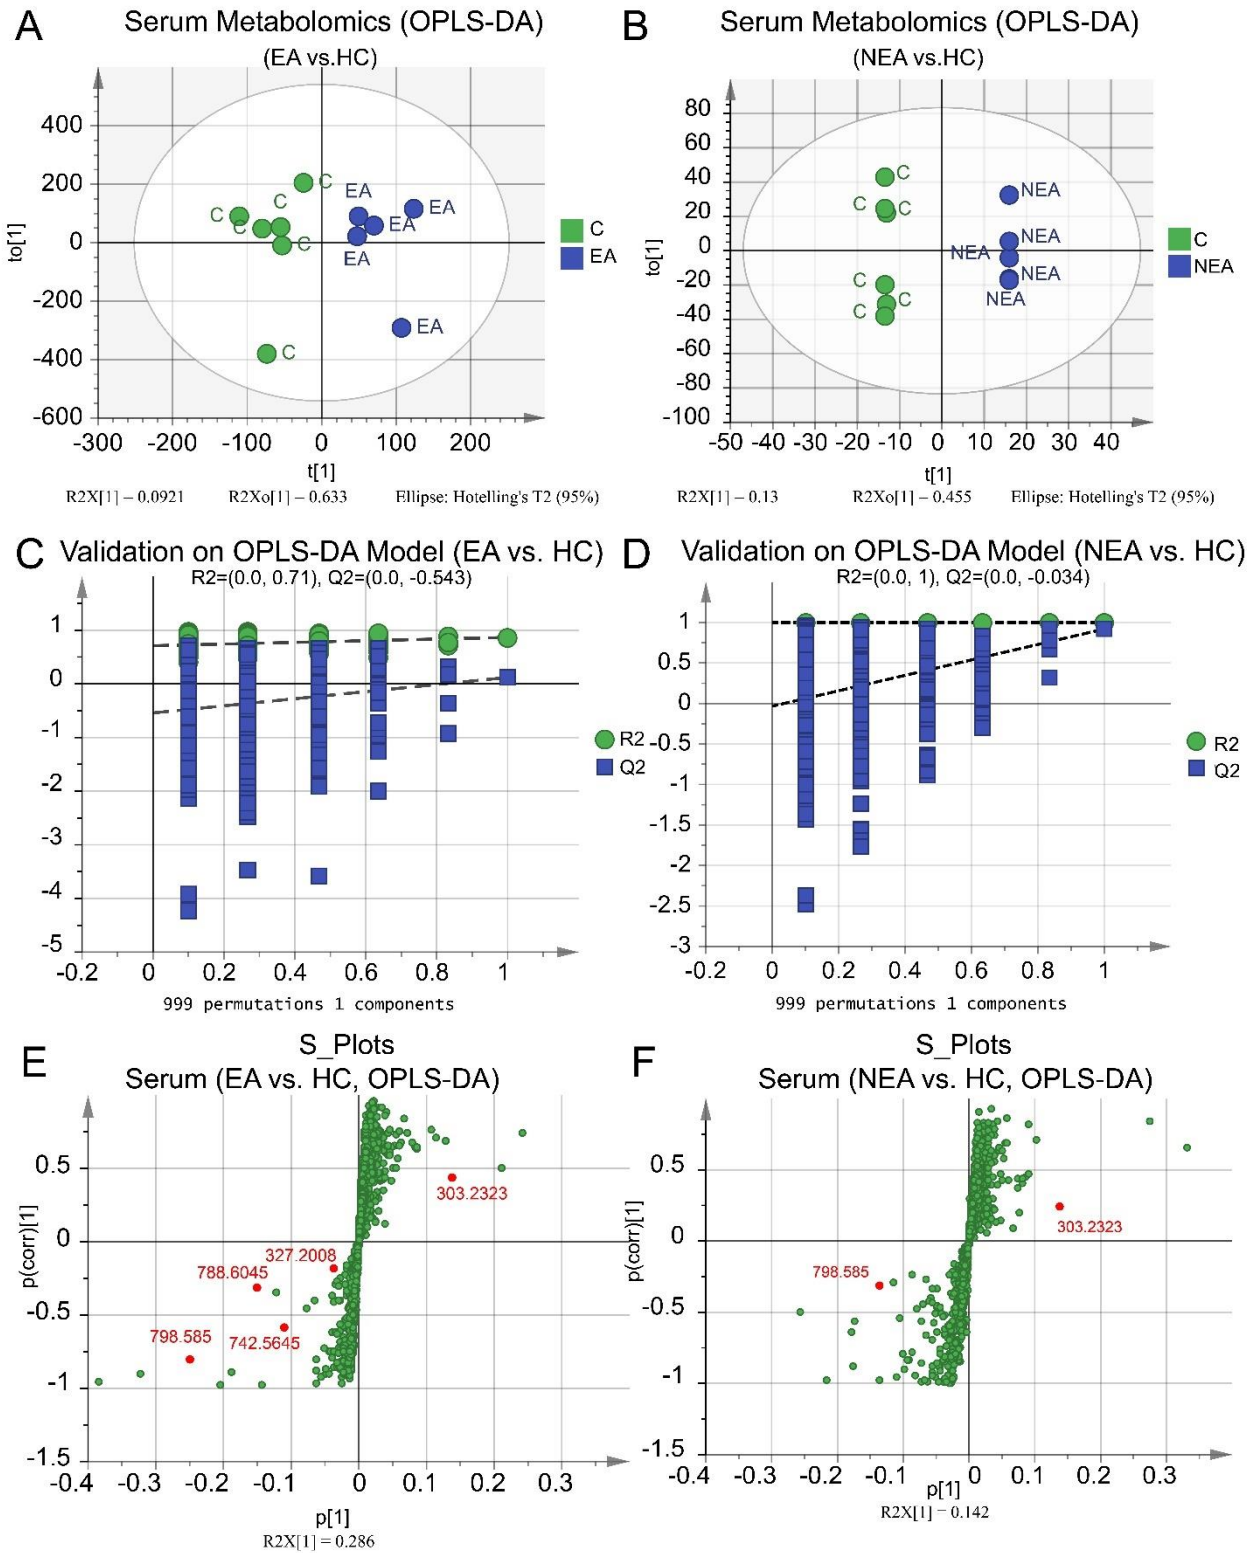

**Figure S16.** OPLS-DA score plots and their permutation tests of serum metabolomic profile with the metabolites identified displayed in the groups. OPLS-DA models of (A) EA vs. HC,  $p < 0.0001$  and (B) NEA vs. HC,  $p < 0.0001$ . The permutation test on the OPLS-DA of (C) EA vs. HC and (D) NEA vs. HC. The S-plots based on OPLS-DA of (E) EA vs. HC and (F) NEA vs. HC and identified metabolites in serum. P values were estimated with CV-ANOVA test. Ellipse in the OPLS-DA panels represents Hotelling's T2 test with the confidence interval of 0.95. The counts of permutation tests are 999.



Supplementary Materials

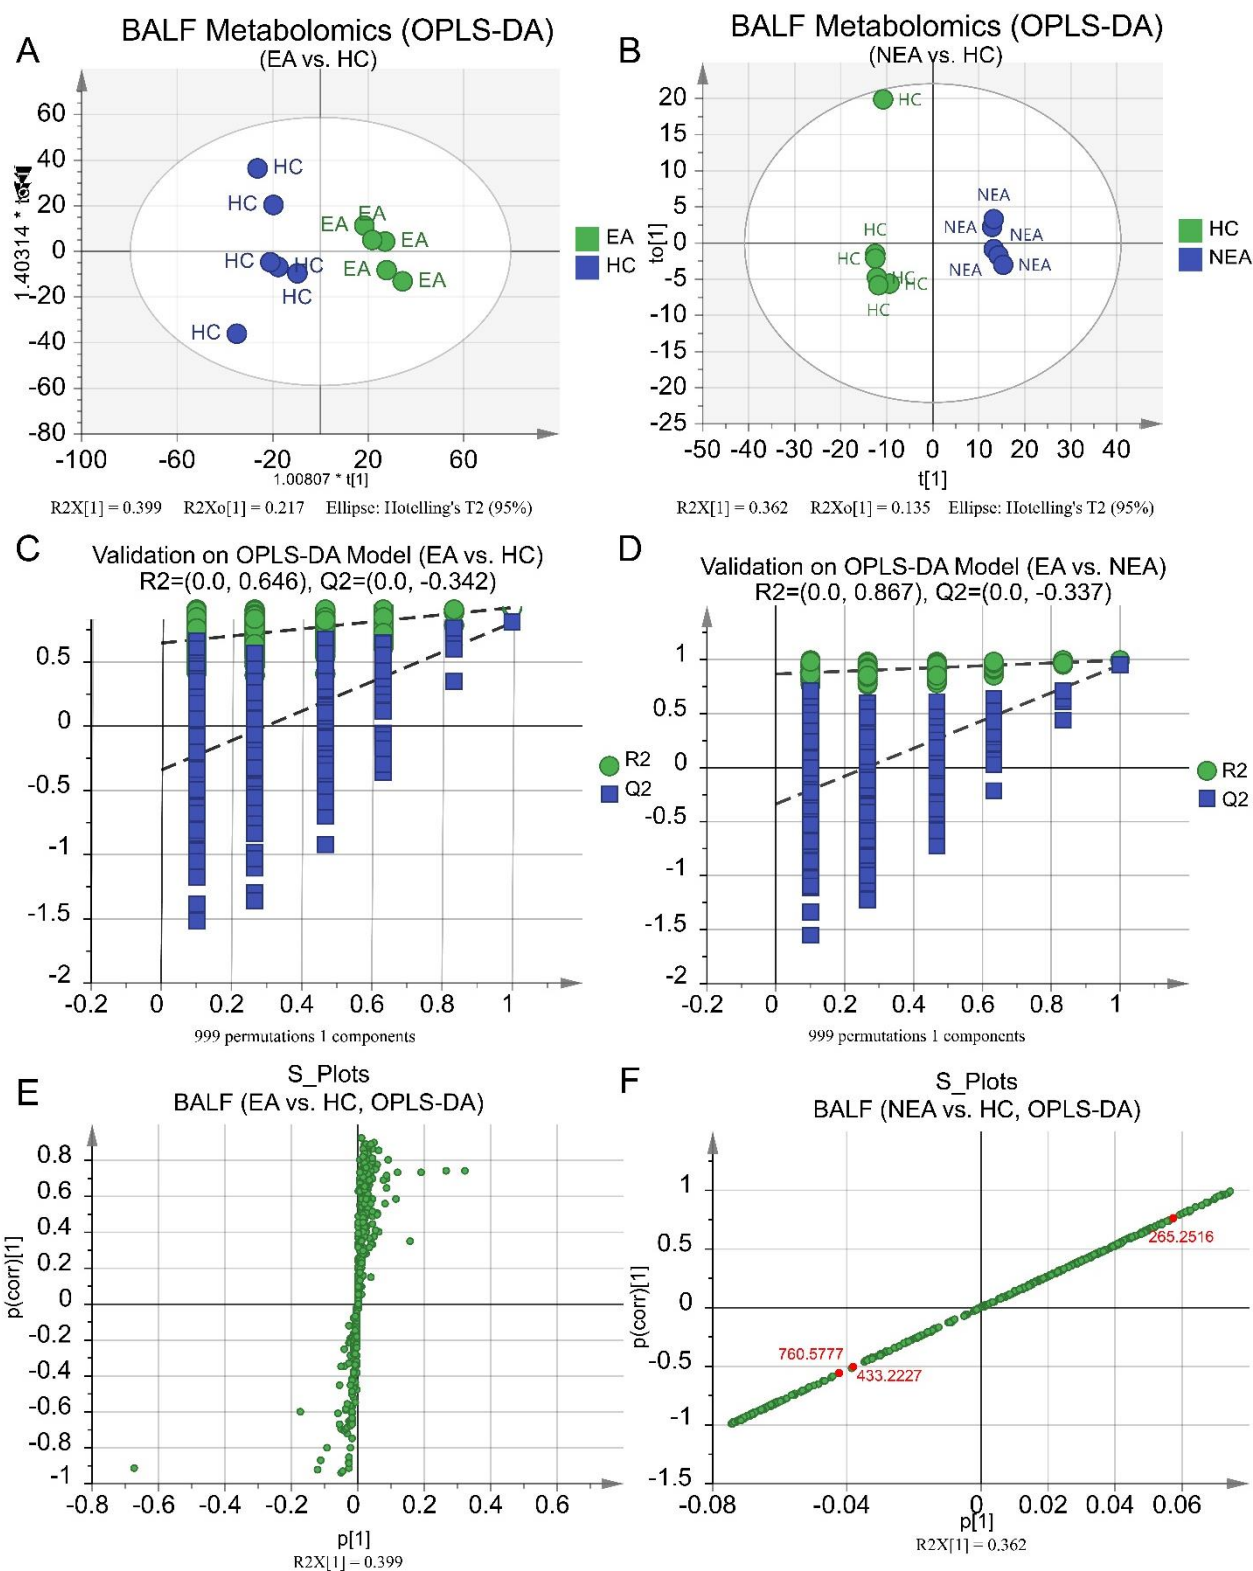

**Figure S17.** OPLS-DA score plots and their permutation tests of BALF metabolomic profile with the metabolites identified displayed in the groups. OPLS-DA models of (A) EA vs. HC,  $P < 0.001$  and (B) NEA vs. HC,  $P < 0.001$ . The permutation test on the OPLS-DA of (C) EA vs. HC and (D) NEA vs. HC. The S-plots based on OPLS-DA of (E) EA vs. HC and (F) NEA vs. HC and identified metabolites in BALF.  $P$  values were estimated with CV-ANOVA test. Ellipse in the OPLS-DA panels represents Hotelling's T2 test with the confidence interval of 0.95. The counts of permutation tests are 999.

Supplementary Materials

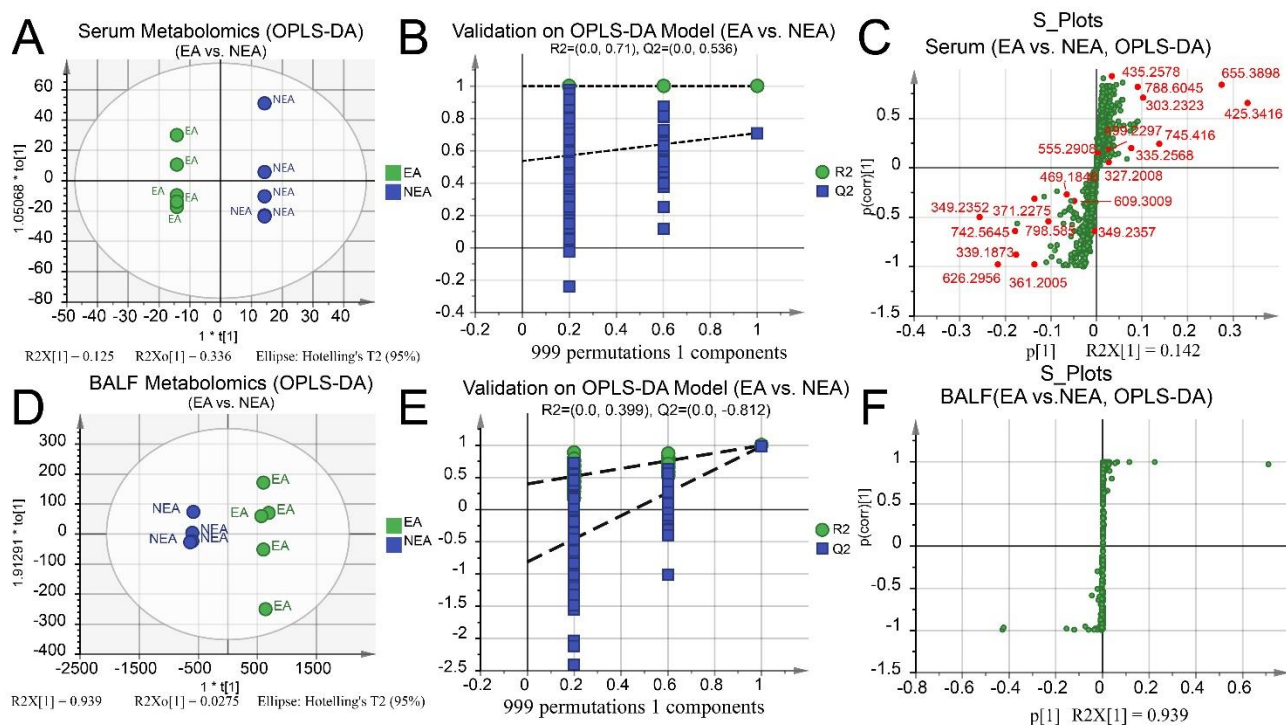

**Figure S18.** OPLS-DA score plots and their permutation tests of serum and BALF metabolomic profile with the metabolites identified displayed in the groups. OPLS-DA models of (A) EA vs. NEA of serum,  $p < 0.0001$ ; (D) EA vs. NEA of BALF,  $p < 0.0001$ . The permutation test on the OPLS-DA of (B) EA vs. NEA of serum and (E) EA vs. NEA of BALF; The S-plots based on OPLS-DA of (C) EA vs. NEA of serum and (F) EA vs. NEA of BALF.

**Table S13.** The Perturbed Metabolic Pathways in Serum and BALF Based on MetaboAnalyst 4.0

| Metabolic Pathways              | Hits | Raw P    | $-\log(P)$ | FDR      | Impact  | Samples |
|---------------------------------|------|----------|------------|----------|---------|---------|
| Steroid hormone biosynthesis    | 14   | 6.54E-10 | 21.148     | 5.23E-08 | 0.0793  | Serum   |
| Retinol metabolism              | 5    | 3.38E-05 | 10.294     | 0.001354 | 0       | Serum   |
| Primary bile acid biosynthesis  | 5    | 0.001403 | 6.5691     | 0.037413 | 0.11049 | Serum   |
| Linoleic acid metabolism        | 3    | 0.002225 | 6.1078     | 0.044508 | 0.65625 | Serum   |
| Glycerophospholipid metabolism  | 4    | 0.005016 | 5.2951     | 0.080254 | 0.33235 | Serum   |
| Terpenoid backbone biosynthesis | 3    | 0.021224 | 3.8526     | 0.28298  | 0.11098 | Serum   |
| Sphingolipid metabolism         | 2    | 0.075136 | 2.5885     | 0.8587   | 0.00954 | Serum   |
| Arachidonic acid metabolism     | 3    | 0.10232  | 2.2797     | 1        | 0.03338 | Serum   |
| Vitamin B6 metabolism           | 1    | 0.44802  | 0.80292    | 1        | 0.13651 | Serum   |
| Glycerophospholipid metabolism  | 3    | 0.000437 | 7.7366     | 0.034925 | 0.32918 | BALF    |
| Steroid hormone biosynthesis    | 3    | 0.006561 | 5.0266     | 0.26245  | 0.01477 | BALF    |
| Linoleic acid metabolism        | 1    | 0.06071  | 2.8017     | 1        | 0       | BALF    |
| Sphingolipid metabolism         | 1    | 0.099319 | 2.3094     | 1        | 0.1402  | BALF    |

Supplementary Materials

Serum Chromatographic Plots

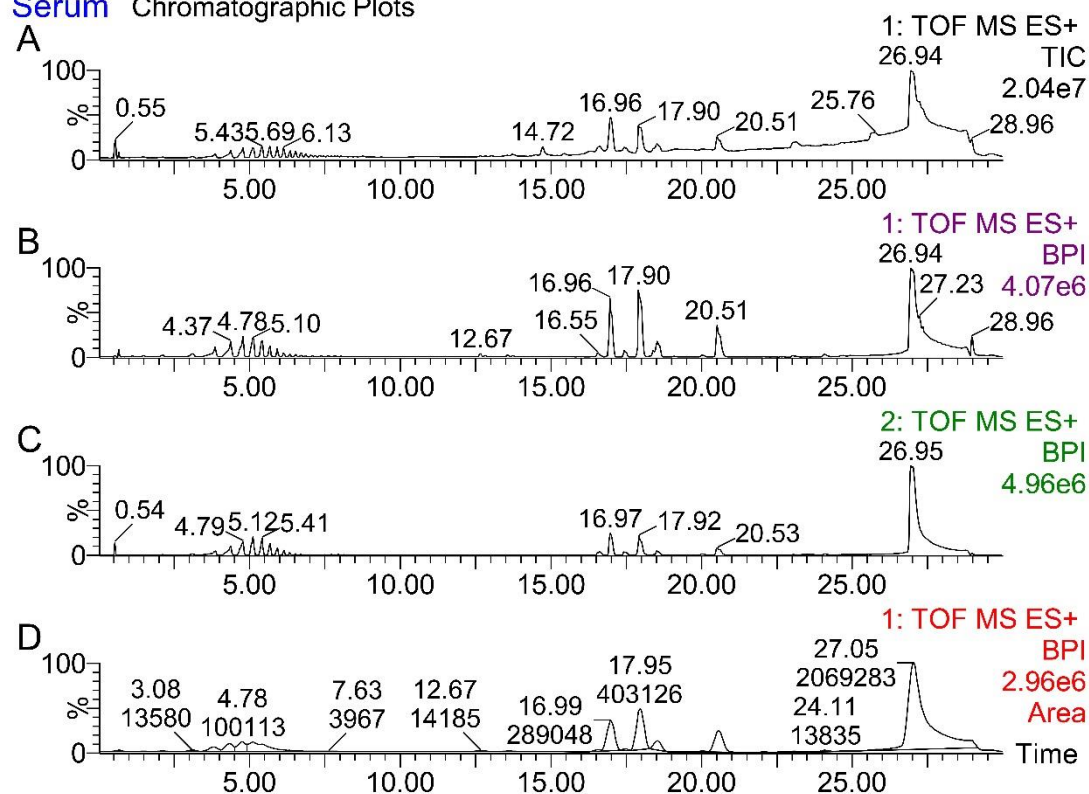

Figure S19. Total Ion Chromatogram (TIC) and Base Peak Ion (BPI) of Serum Samples.

BALF Chromatographic Plots

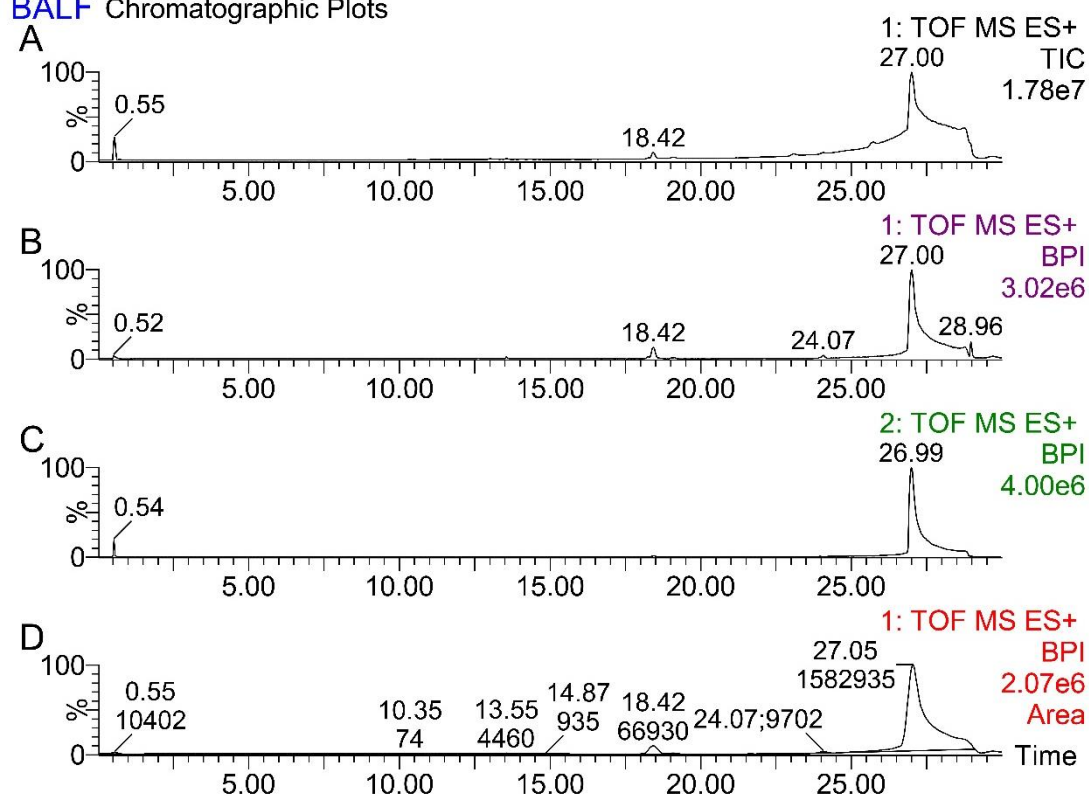

Figure S20. Total Ion Chromatogram (TIC) and Base Peak Ion (BPI) of BALF Samples.

2.04\_327.2008

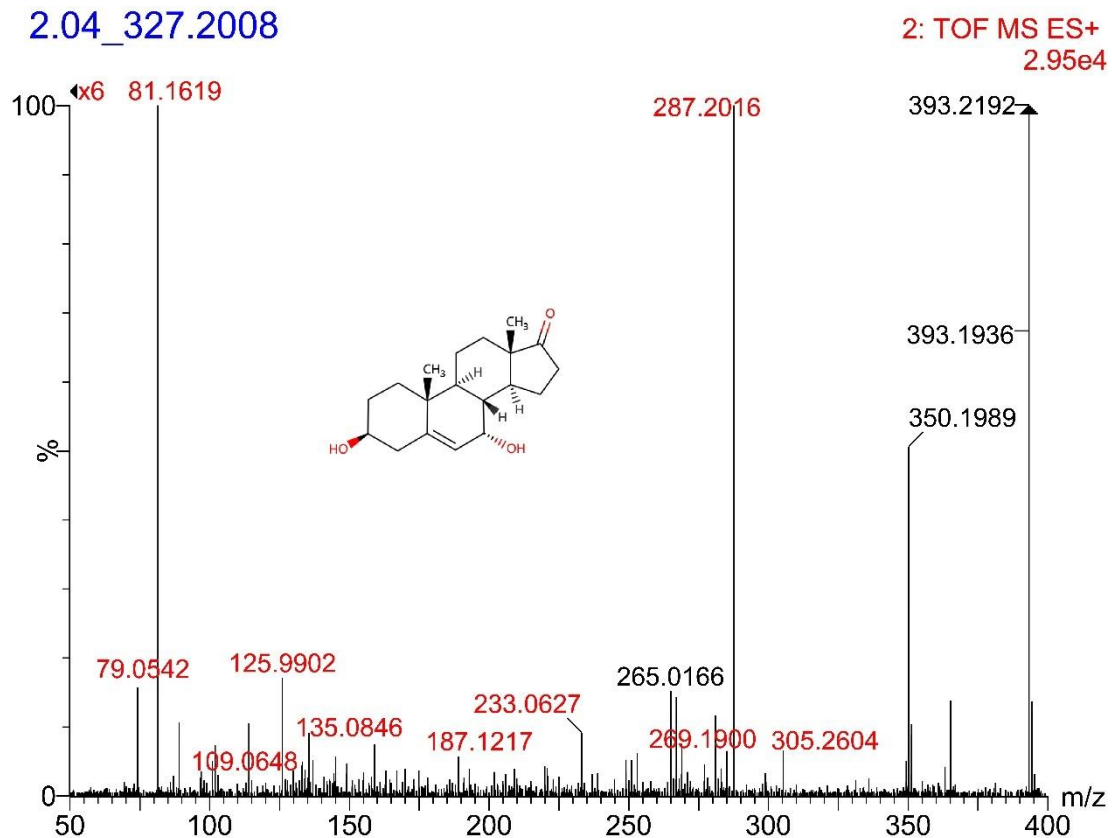

Figure S21. Identification Plot of Metabolite M1 with Mass Spectrum.

2.04\_327.2008

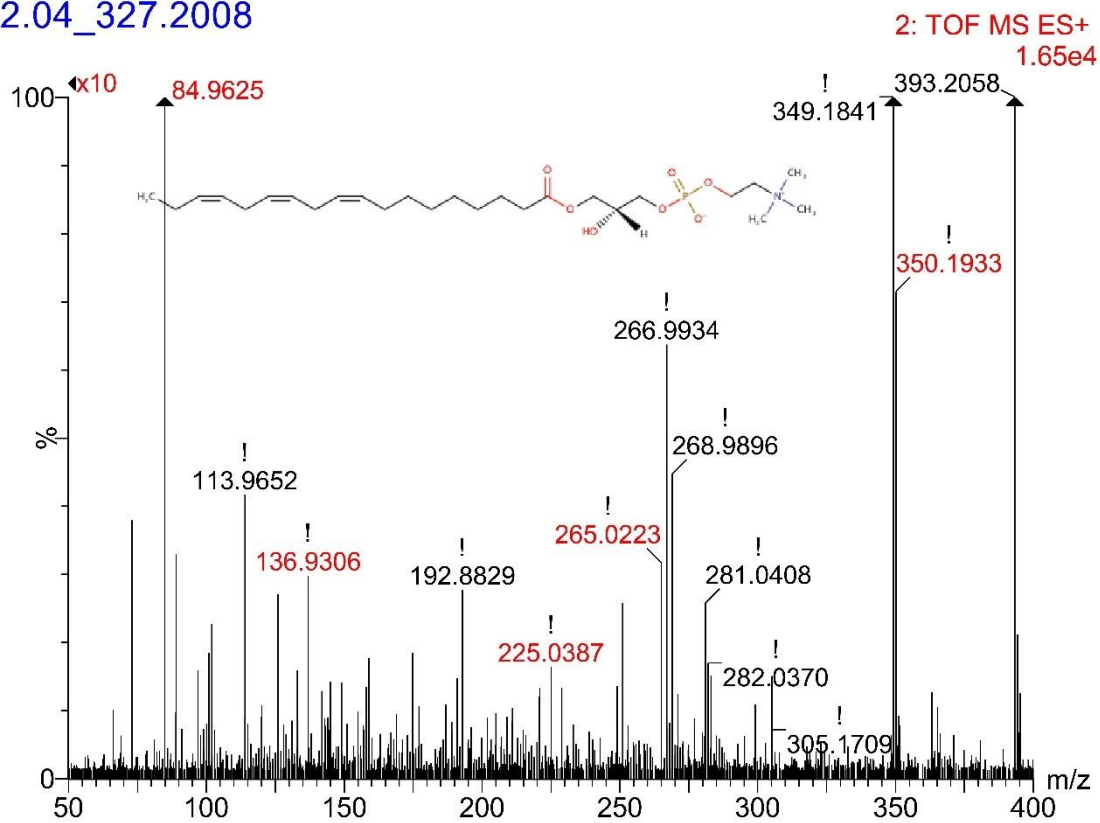

Figure S22. Identification Plot of Metabolite M2 with Mass Spectrum.

3.02\_371.2275

2: TOF MS ES+  
5.39e3

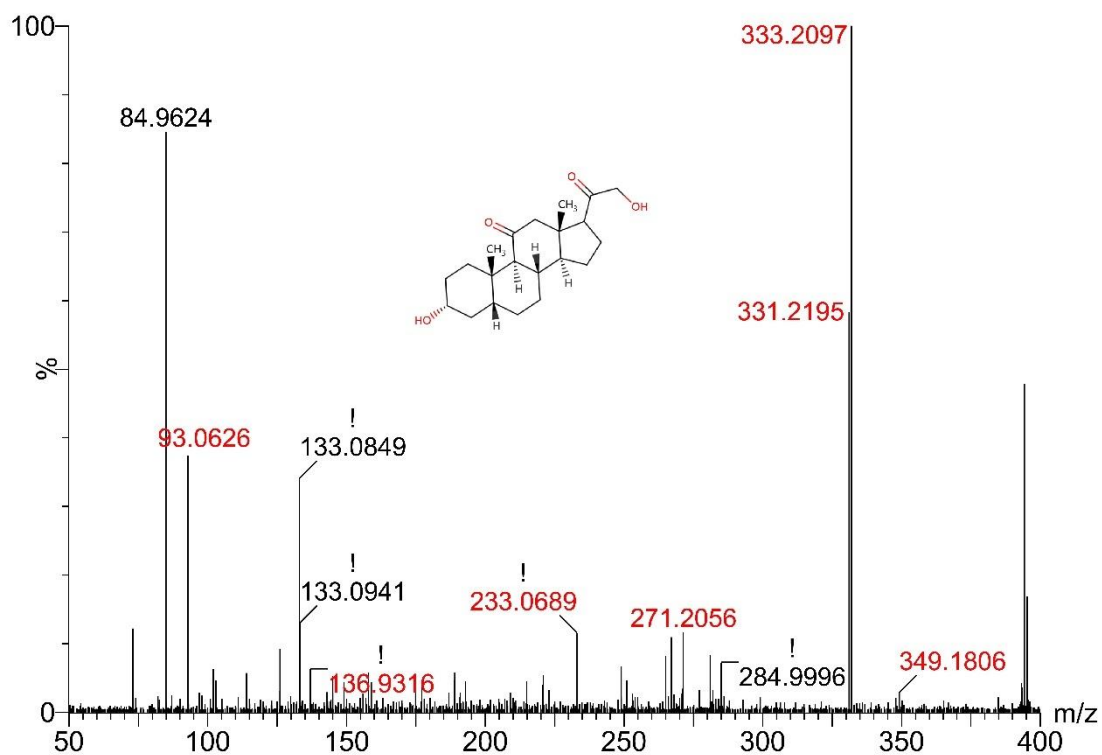

Figure S23. Identification Plot of Metabolite M3 with Mass Spectrum.

5.67\_248.0248

2: TOF MS ES+  
3.11e4

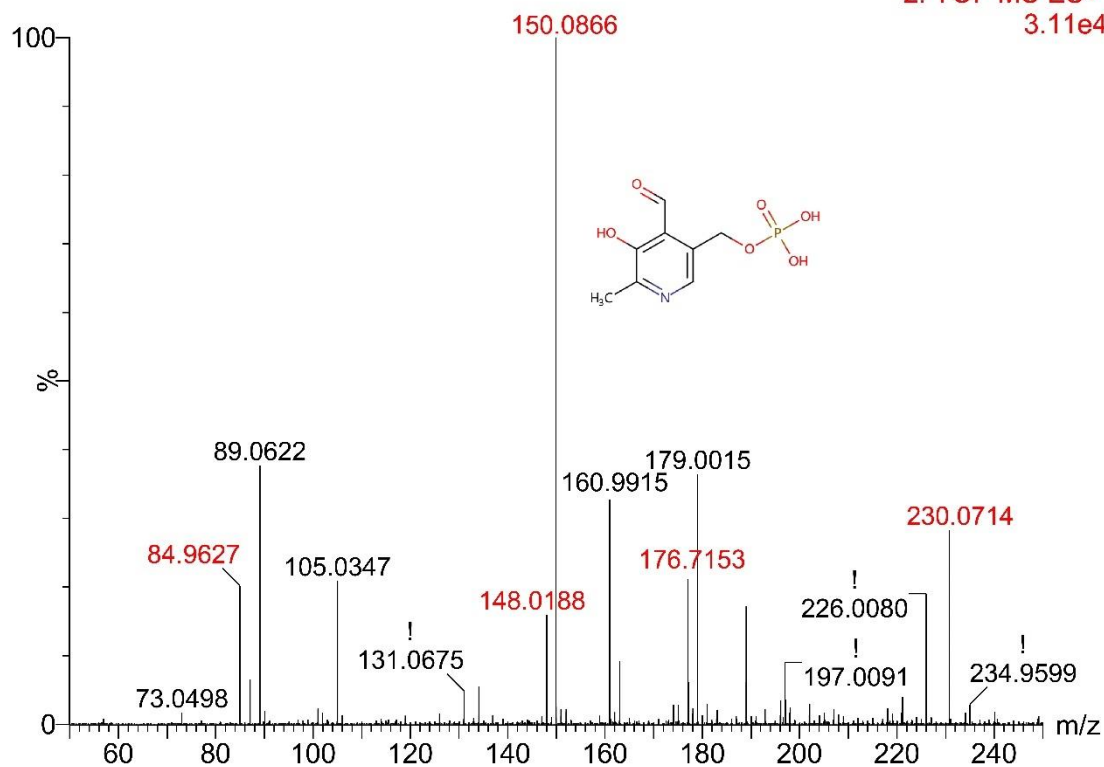

Figure S24. Identification Plot of Metabolite M4 with Mass Spectrum.



Supplementary Materials

6.87\_435.2578

2: TOF MS ES+  
2.03e4

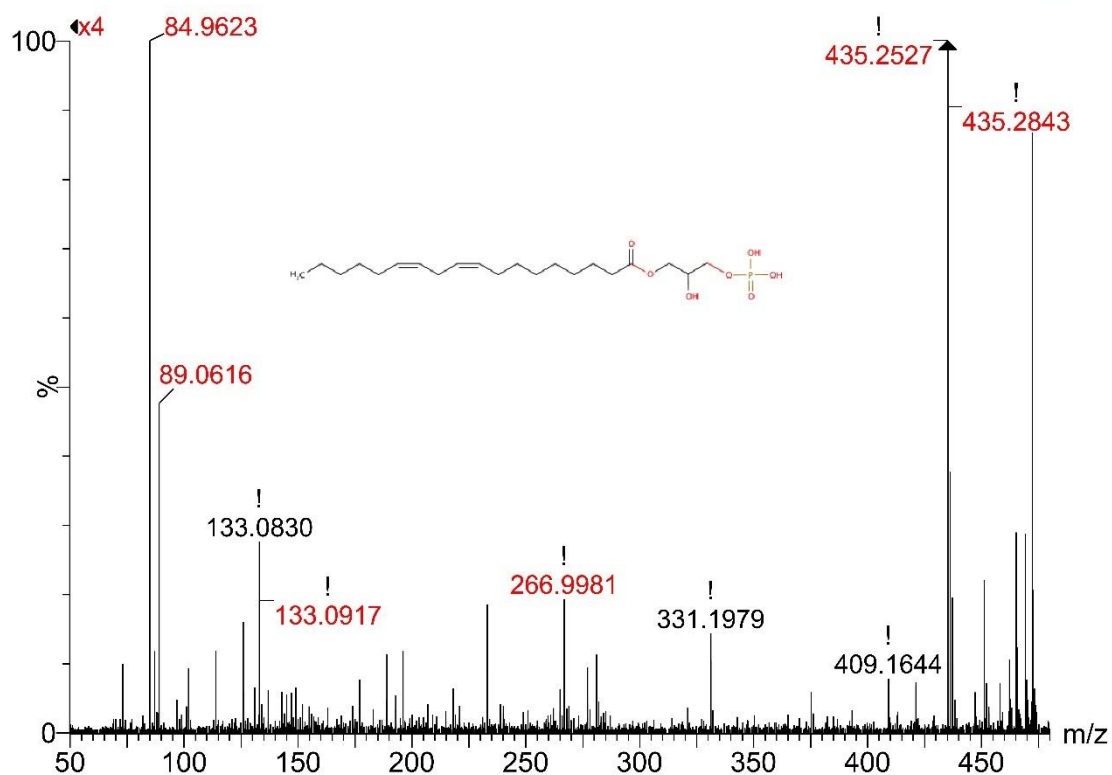

6.11\_745.416

2: TOF MS ES+  
2.48e5

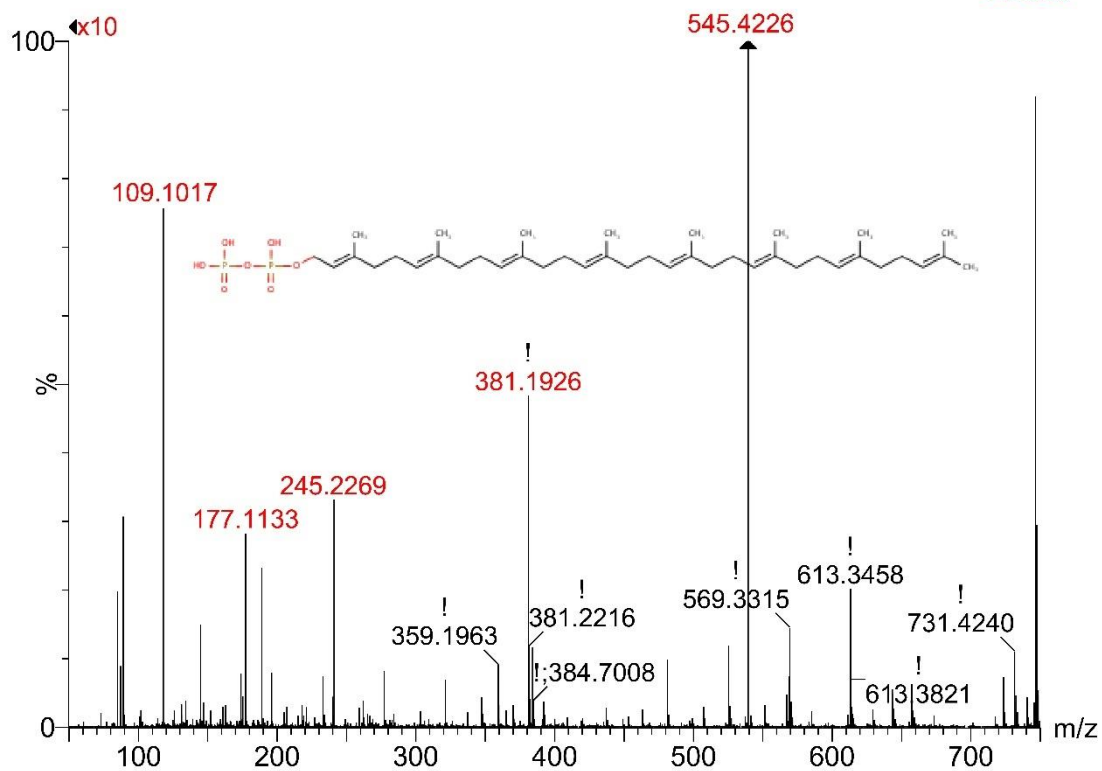

Figure S25. Identification Plot of Metabolite M5 with Mass Spectrum.



6.87\_435.2578

2: TOF MS ES+  
2.03e4



Figure S26. Identification Plot of Metabolite M6 with Mass Spectrum.

6.87\_465.2470

2: TOF MS ES+  
1.67e4

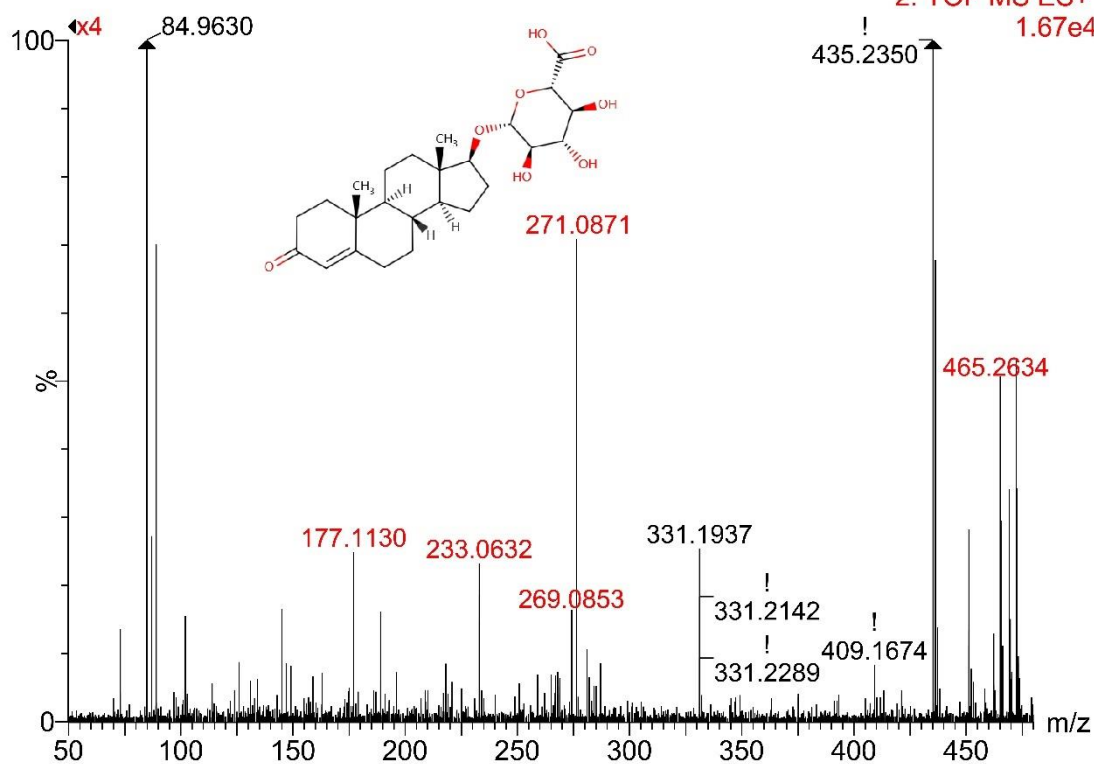

Figure S27. Identification Plot of Metabolite M7 with Mass Spectrum.

8.1\_655.3898

2: TOF MS ES+  
5.37e4

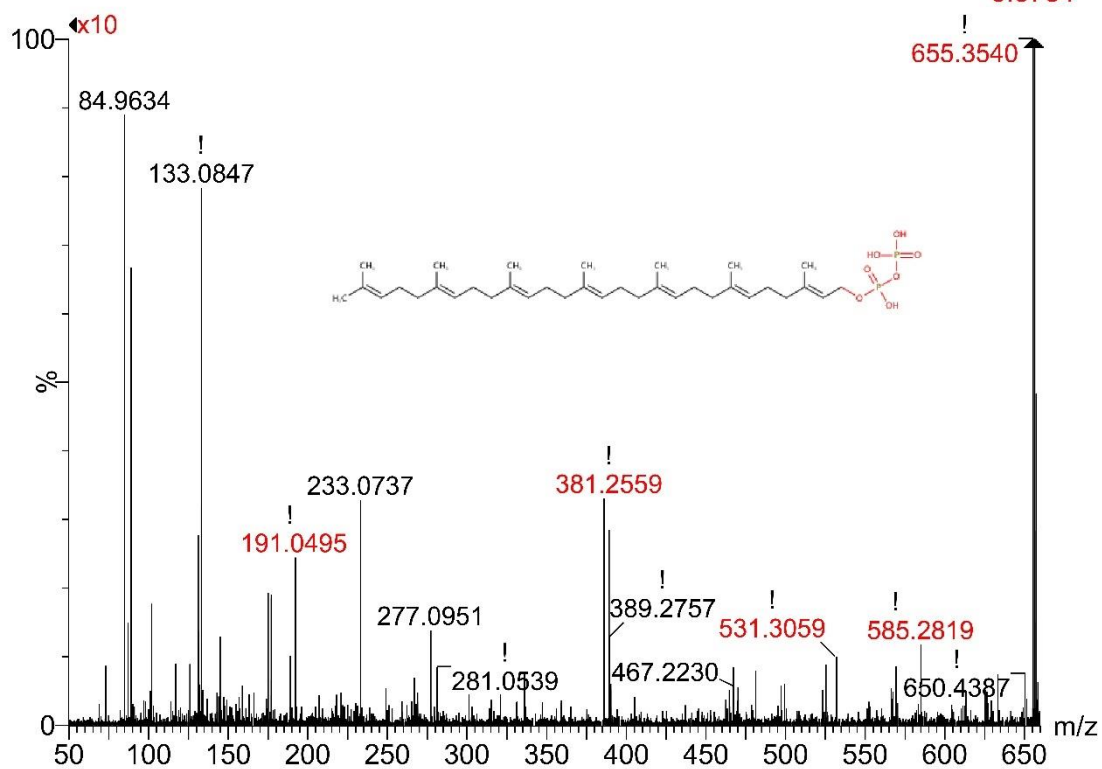

Figure S28. Identification Plot of Metabolite M8 with Mass Spectrum.

8.12\_339.1873

2: TOF MS ES+  
6.26e3

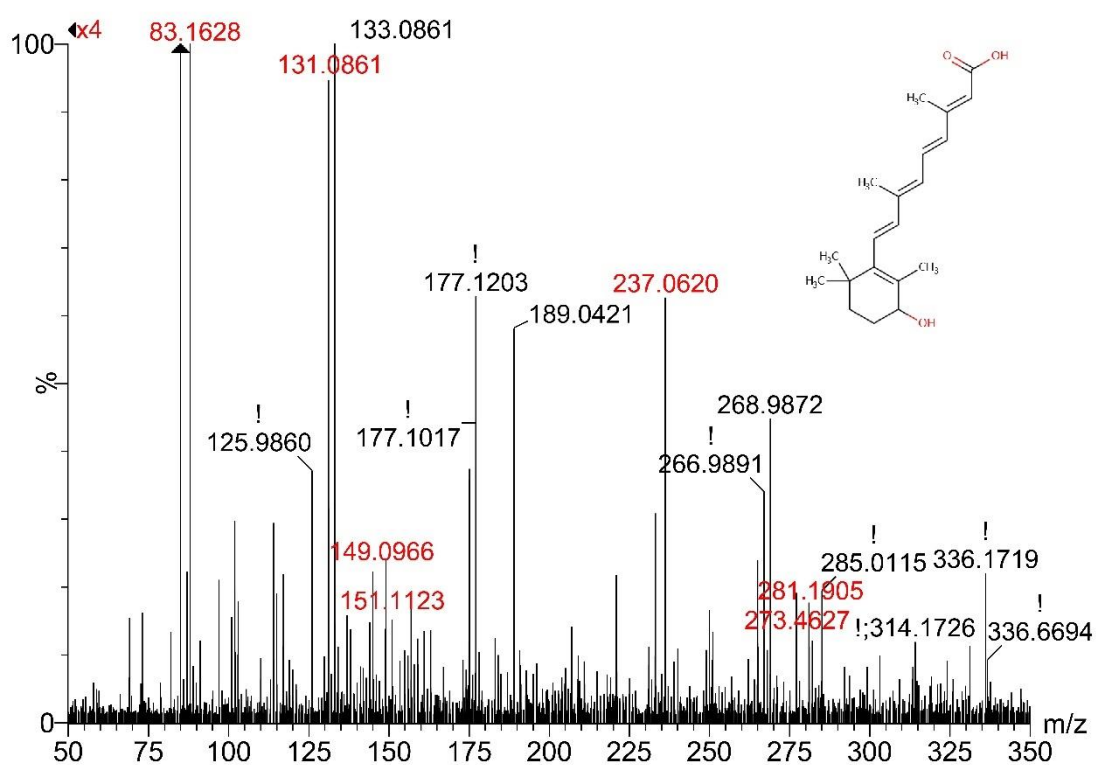

Figure S29. Identification Plot of Metabolite M9 with Mass Spectrum.

8.29\_361.2005

2: TOF MS ES+  
6.29e3

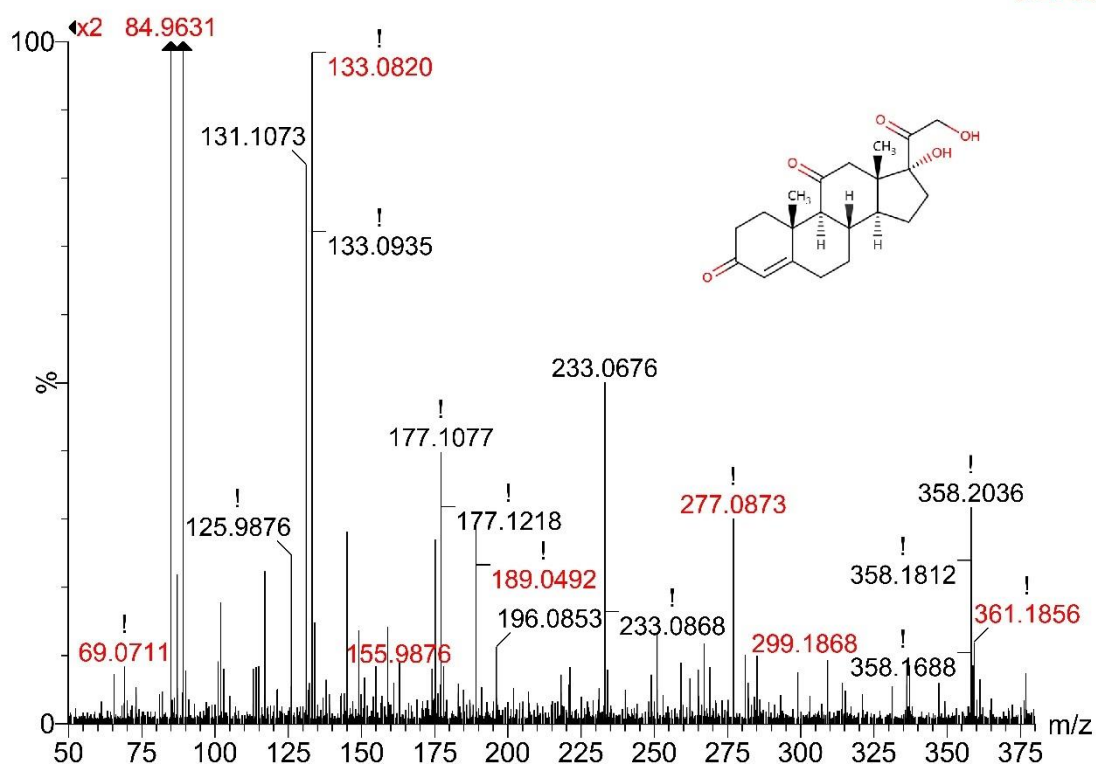

Figure S30. Identification Plot of Metabolite M10 with Mass Spectrum.

12.79\_318.3007

2: TOF MS ES+  
1.56e4

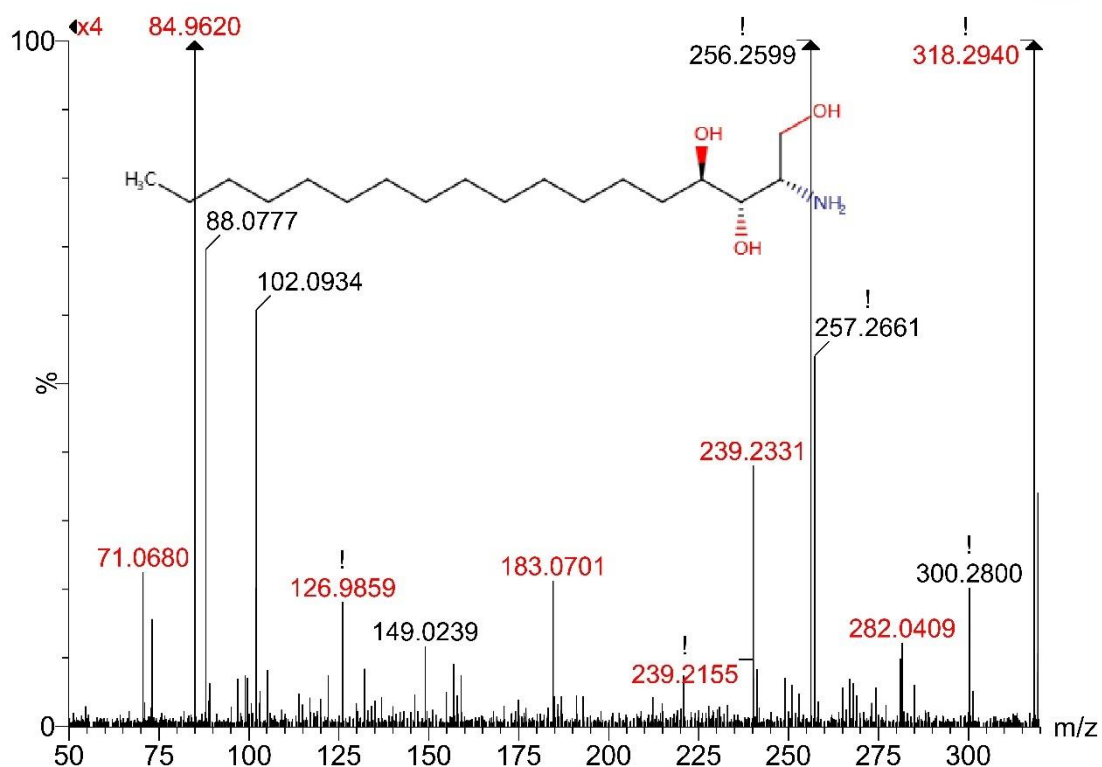

Figure S31. Identification Plot of Metabolite M11 with Mass Spectrum.

14.9\_302.3065

2: TOF MS ES+  
3.89e4

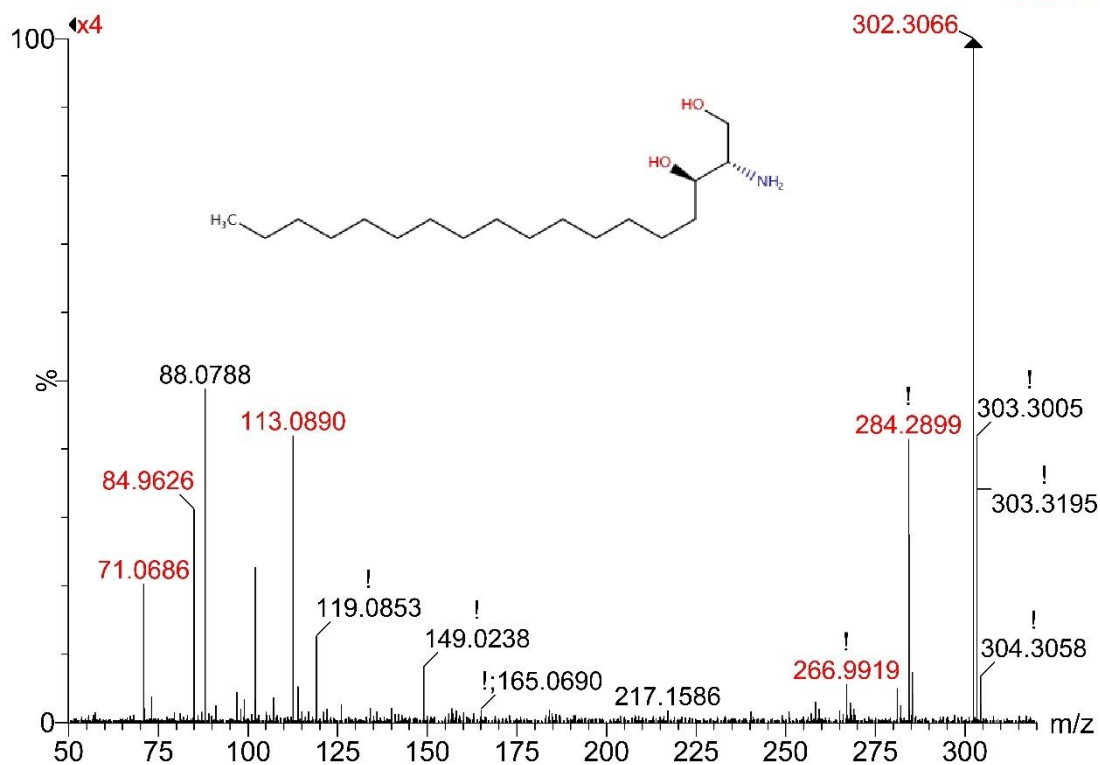

Figure S32. Identification Plot of Metabolite M12 with Mass Spectrum.

18.12\_303.2323

2: TOF MS ES+  
1.38e5

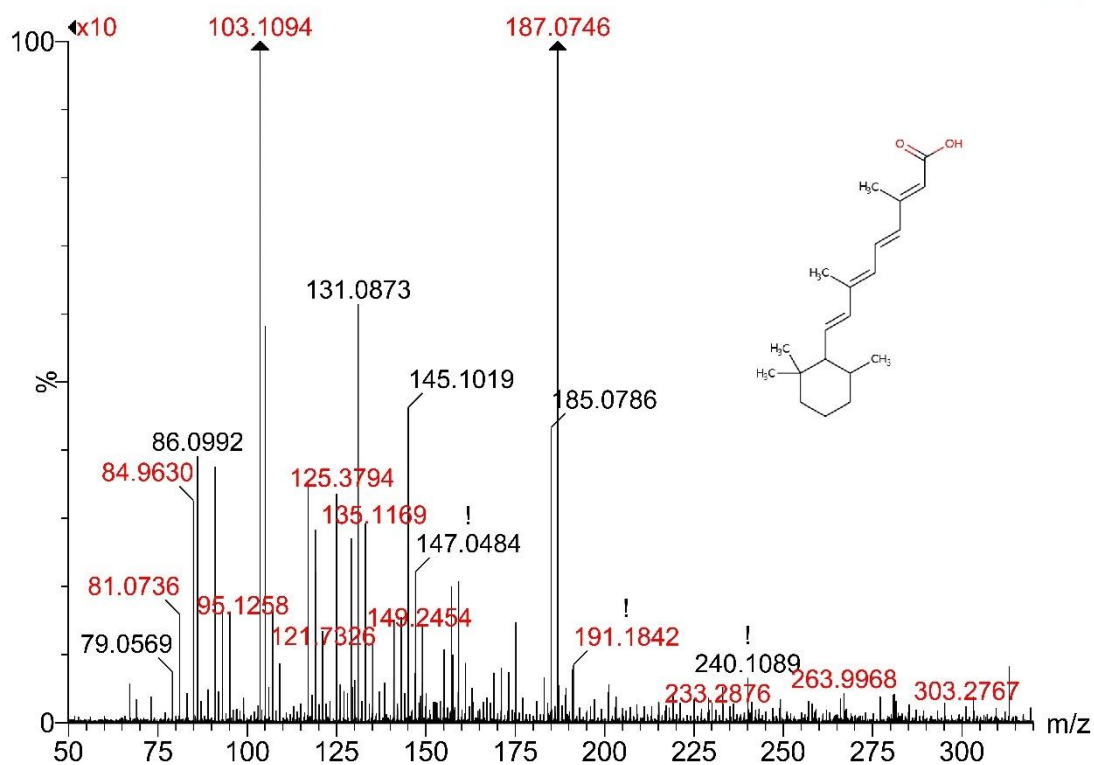

Figure S33. Identification Plot of Metabolite M13 with Mass Spectrum.

Supplementary Materials

18.4\_298.1327

2: TOF MS ES+  
3.89e4

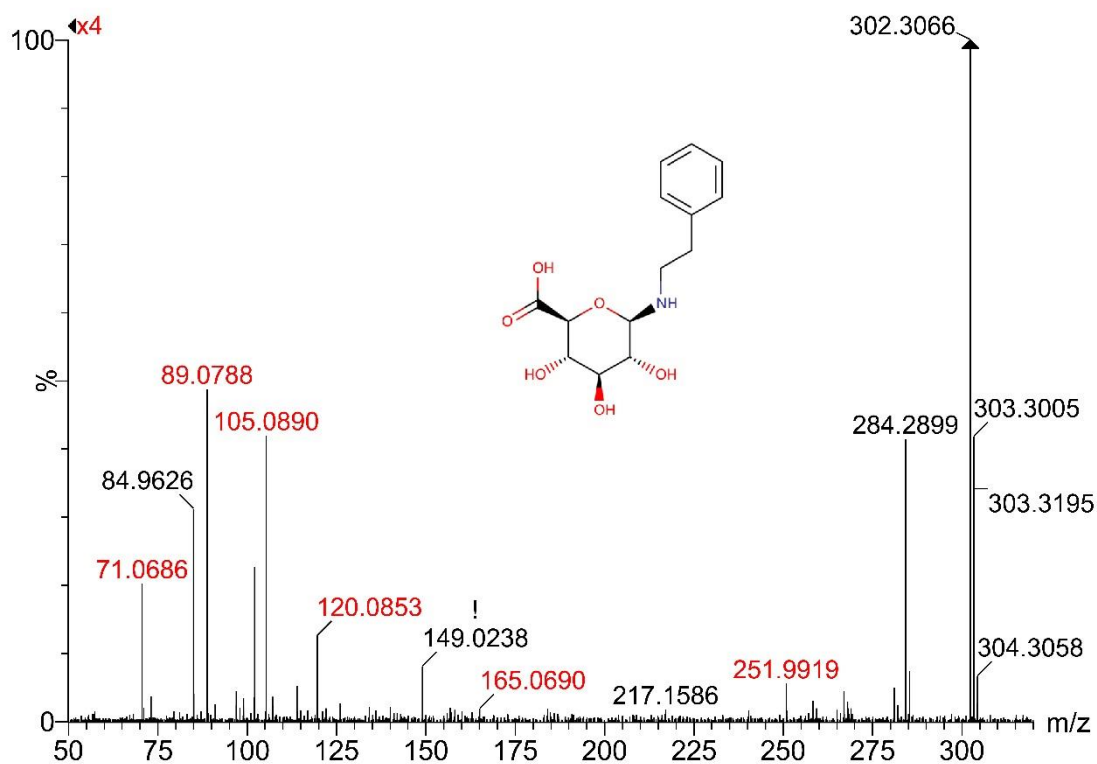

Figure S34. Identification Plot of Metabolite M14 with Mass Spectrum.

19.1\_349.2352

2: TOF MS ES+  
3.10e4

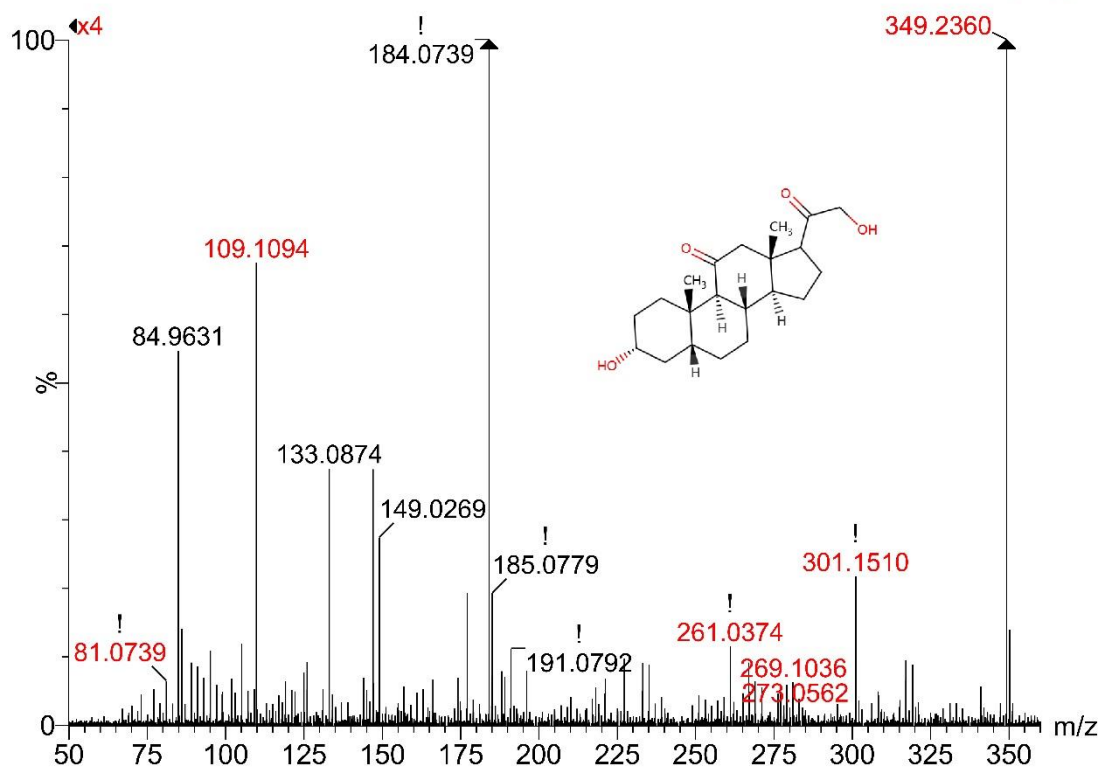

Figure S35. Identification Plot of Metabolite M15 with Mass Spectrum.

19.12\_626.2956

2: TOF MS ES+  
3.47e4

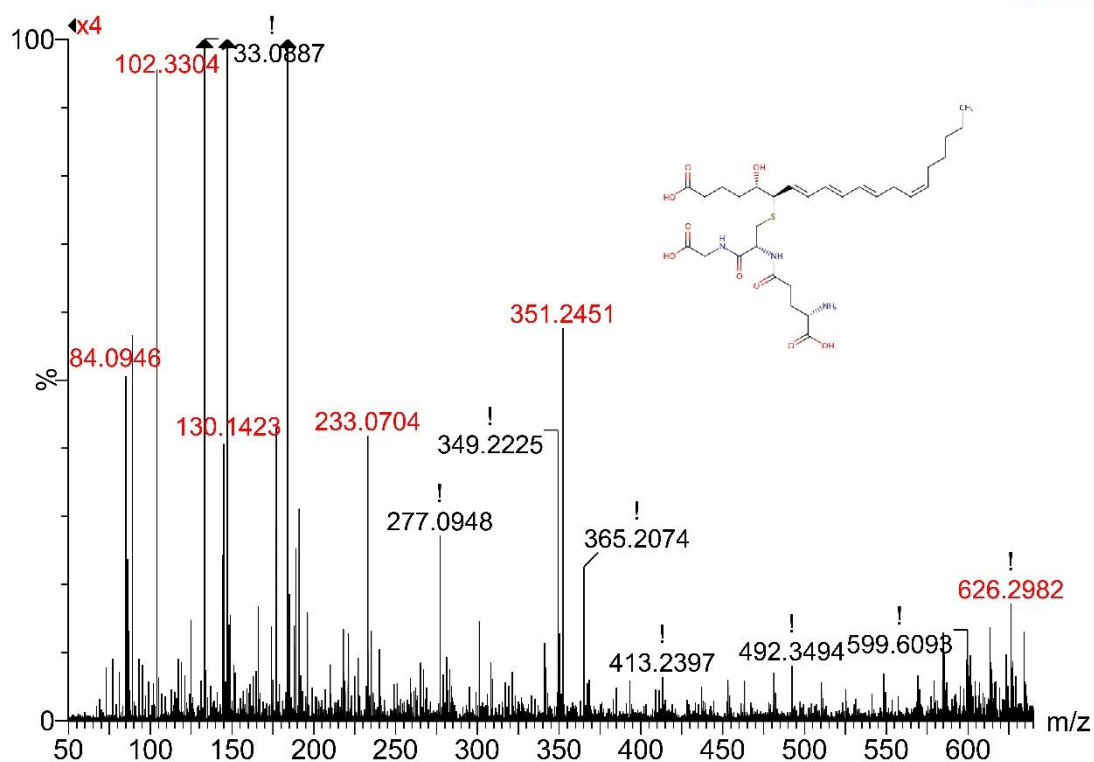

Figure S36. Identification Plot of Metabolite M16 with Mass Spectrum.

20.04\_609.3009

2: TOF MS ES+  
1.31e5

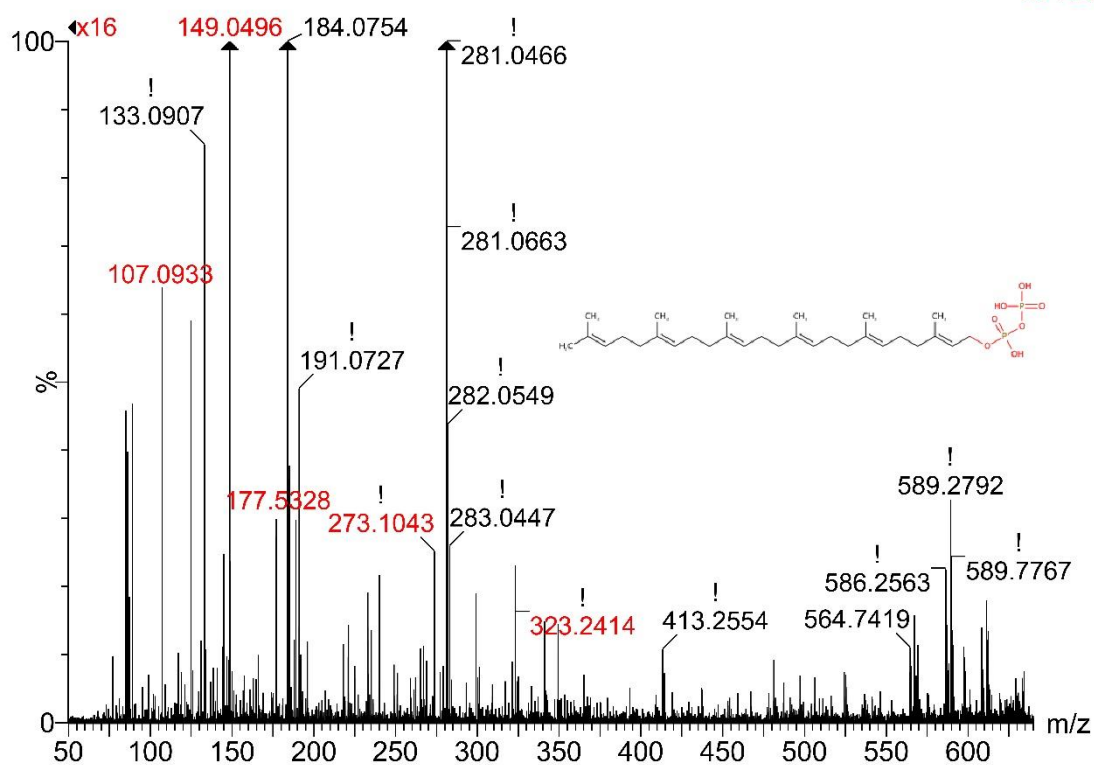

Figure S37. Identification Plot of Metabolite M17 with Mass Spectrum.



20.3\_499.2297

2: TOF MS ES+  
4.34e4

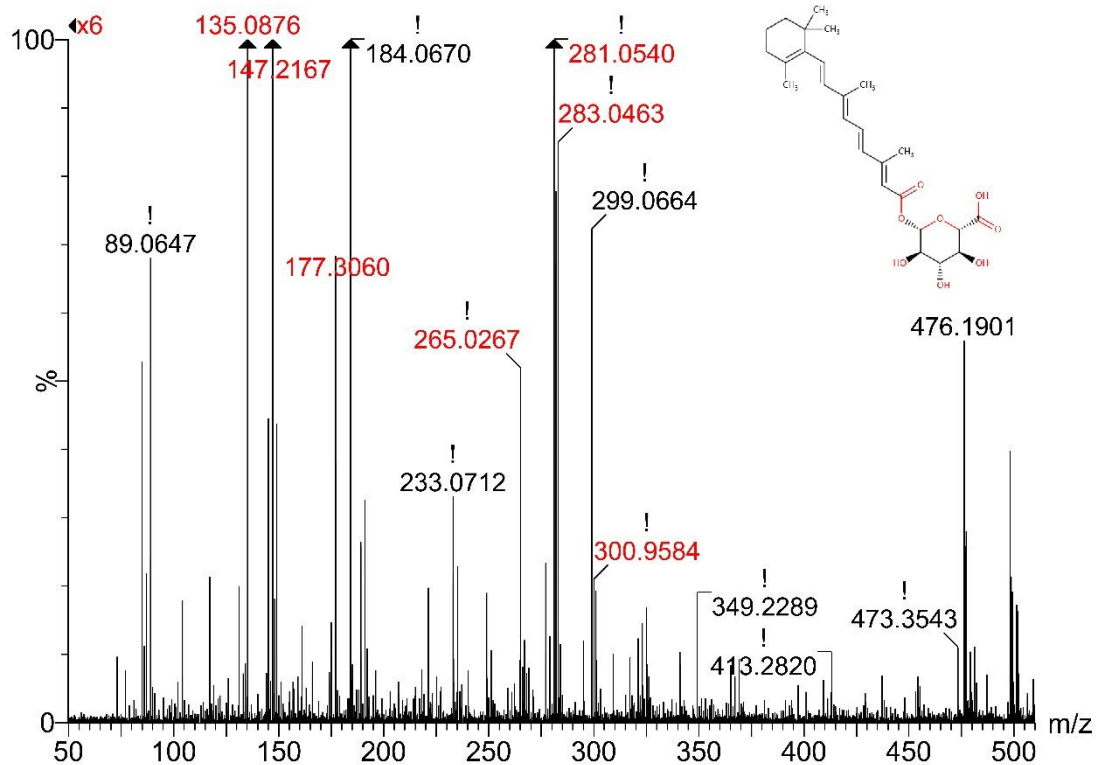

Figure S38. Identification Plot of Metabolite M18 with Mass Spectrum.

21.997\_450.3213

2: TOF MS ES+  
7.61e3

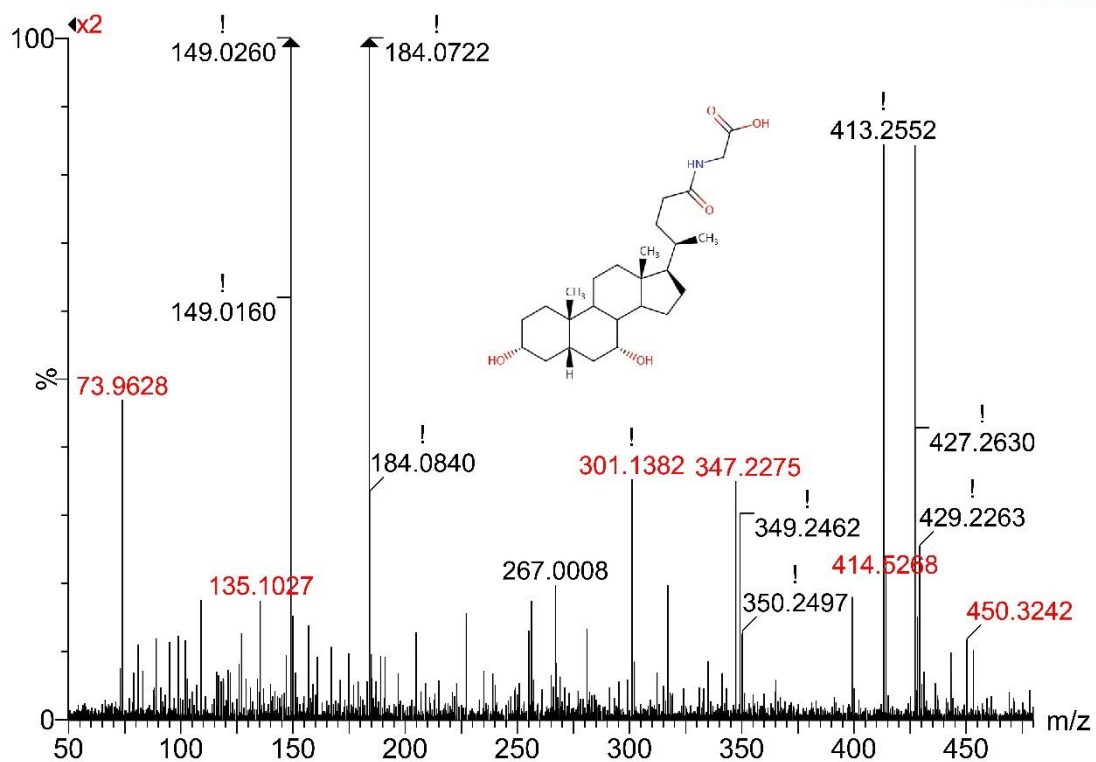

Figure S39. Identification Plot of Metabolite M19 with Mass Spectrum.

22.697\_265.2516

2: TOF MS ES+  
1.07e4

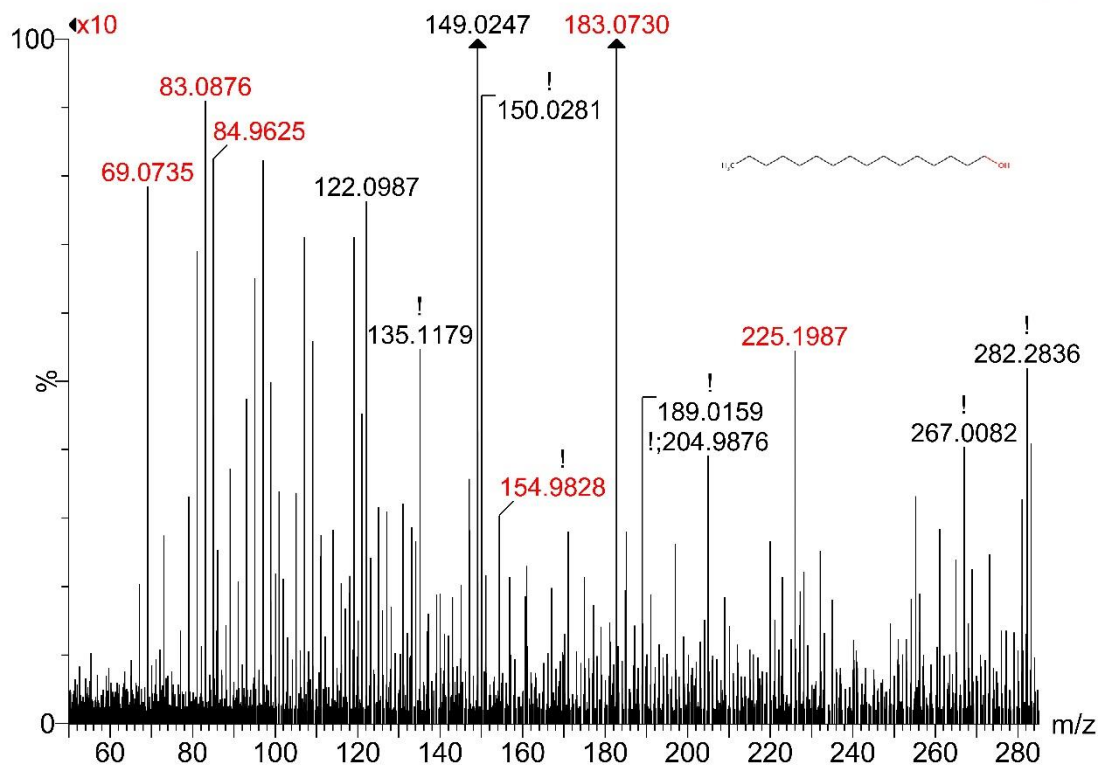

Figure S40. Identification Plot of Metabolite M20 with Mass Spectrum.

23.104\_433.2227

2: TOF MS ES+  
4.07e4

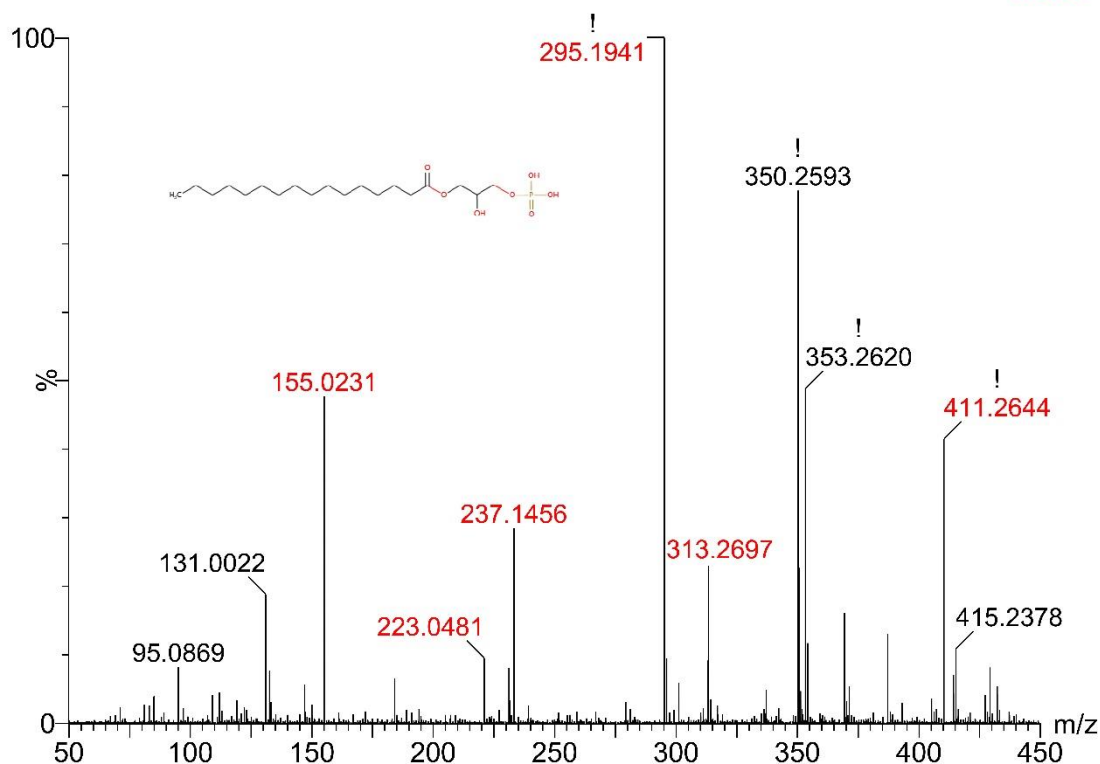

Figure S41. Identification Plot of Metabolite M21 with Mass Spectrum.

23.12\_555.2908

2: TOF MS ES+  
8.69e4

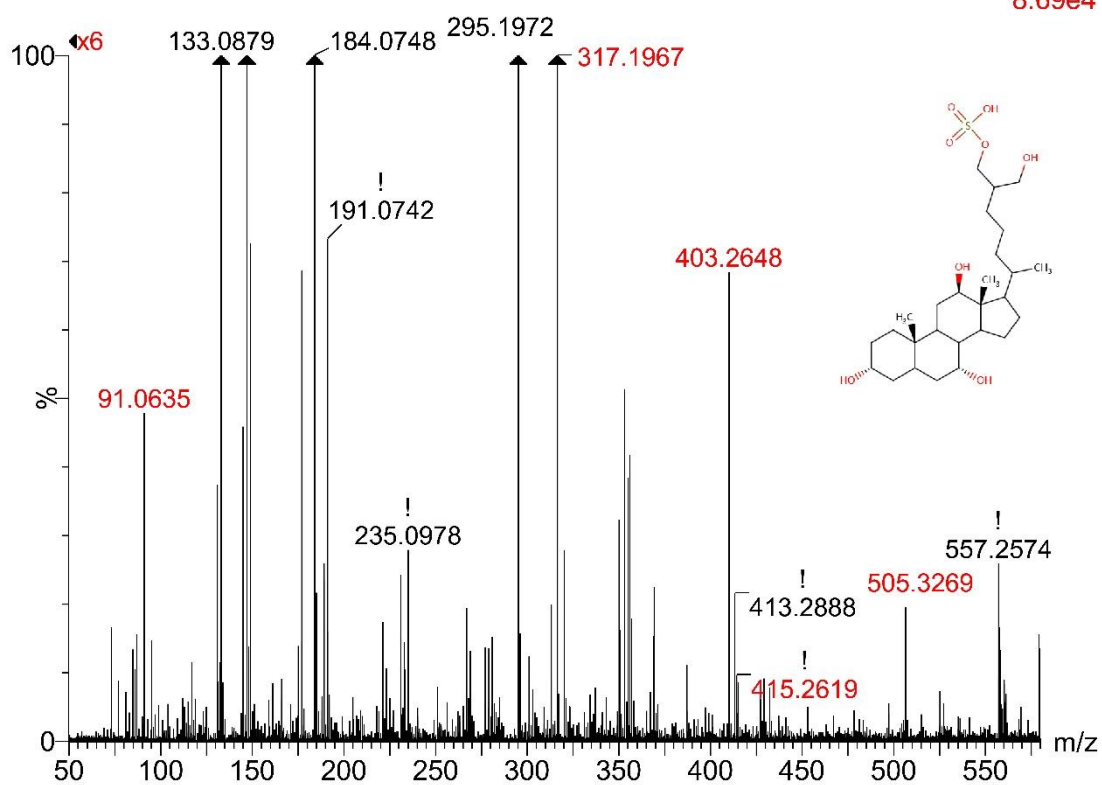

Figure S42. Identification Plot of Metabolite M22 with Mass Spectrum.

23.13\_349.2357

2: TOF MS ES+  
1.81e5

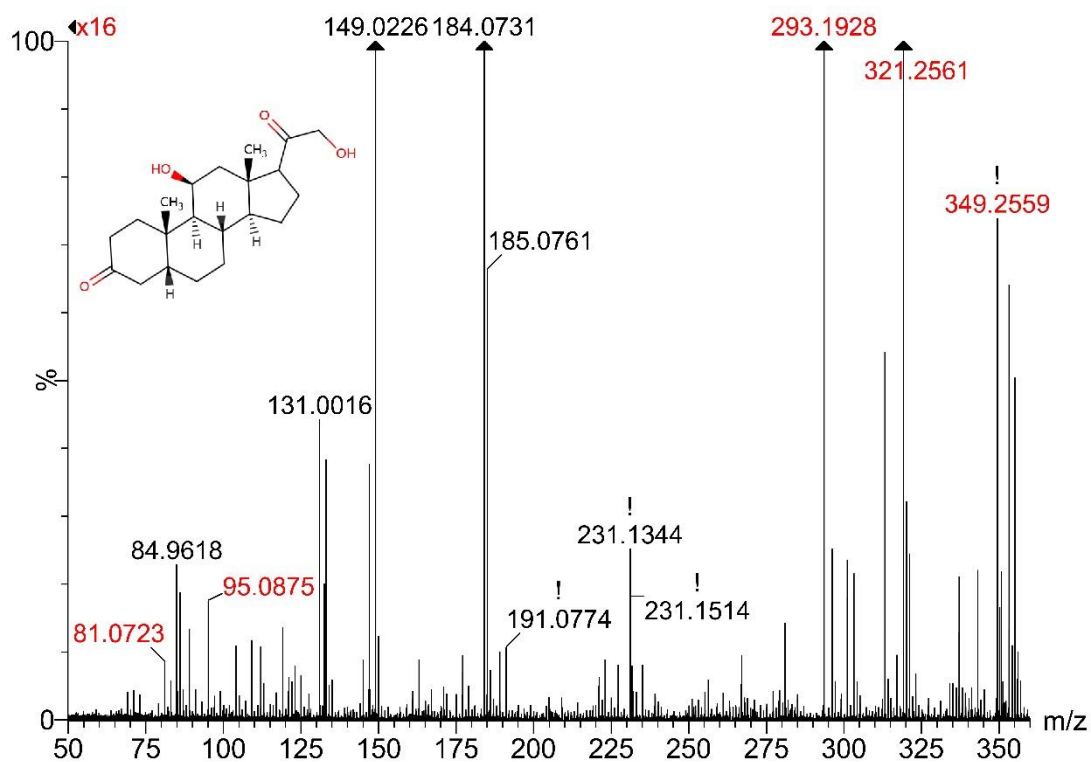

Figure S43. Identification Plot of Metabolite M23 with Mass Spectrum.

23.43\_469.1846

2: TOF MS ES+  
1.04e5

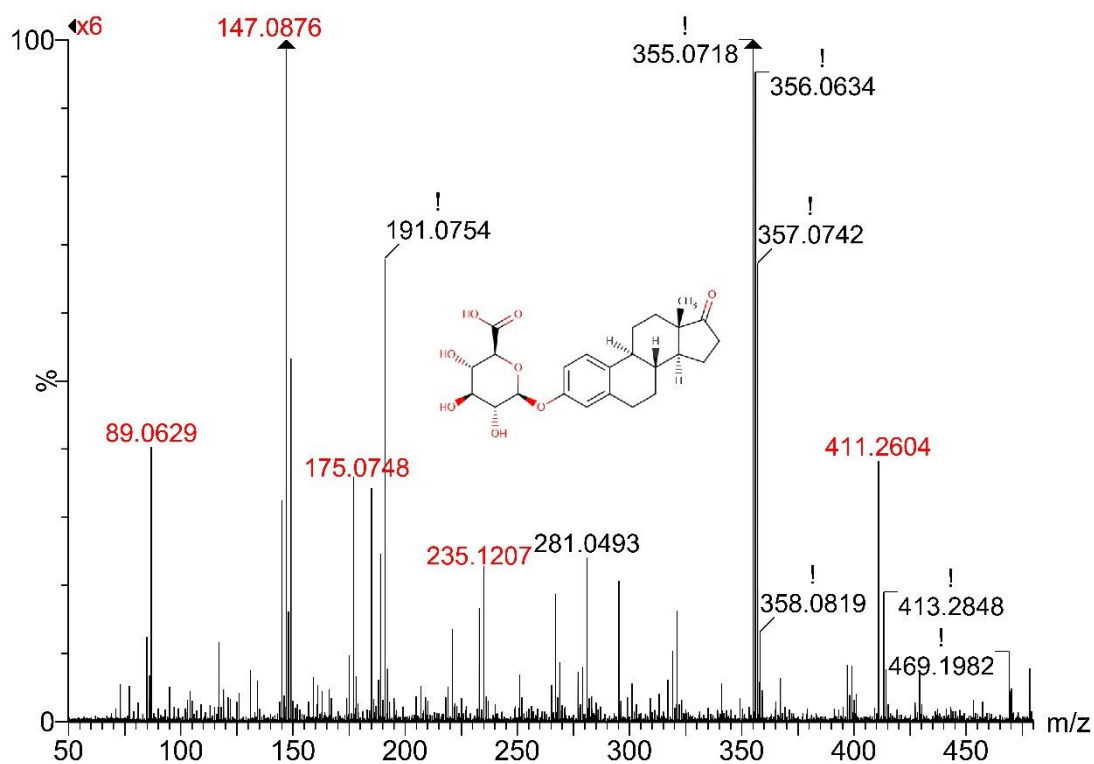

Figure S44. Identification Plot of Metabolite M24 with Mass Spectrum.

24.1\_335.2568

2: TOF MS ES+  
3.63e5

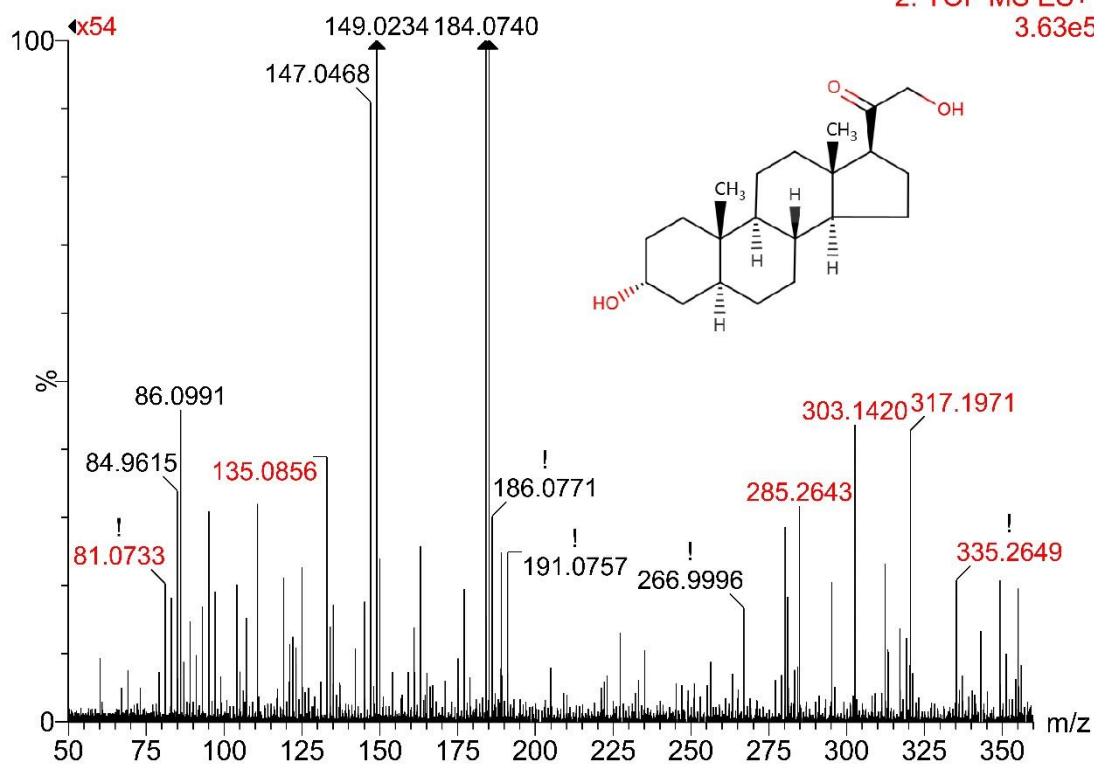

Figure S45. Identification Plot of Metabolite M25 with Mass Spectrum.

26.69\_742.5645

2: TOF MS ES+  
1.07e6

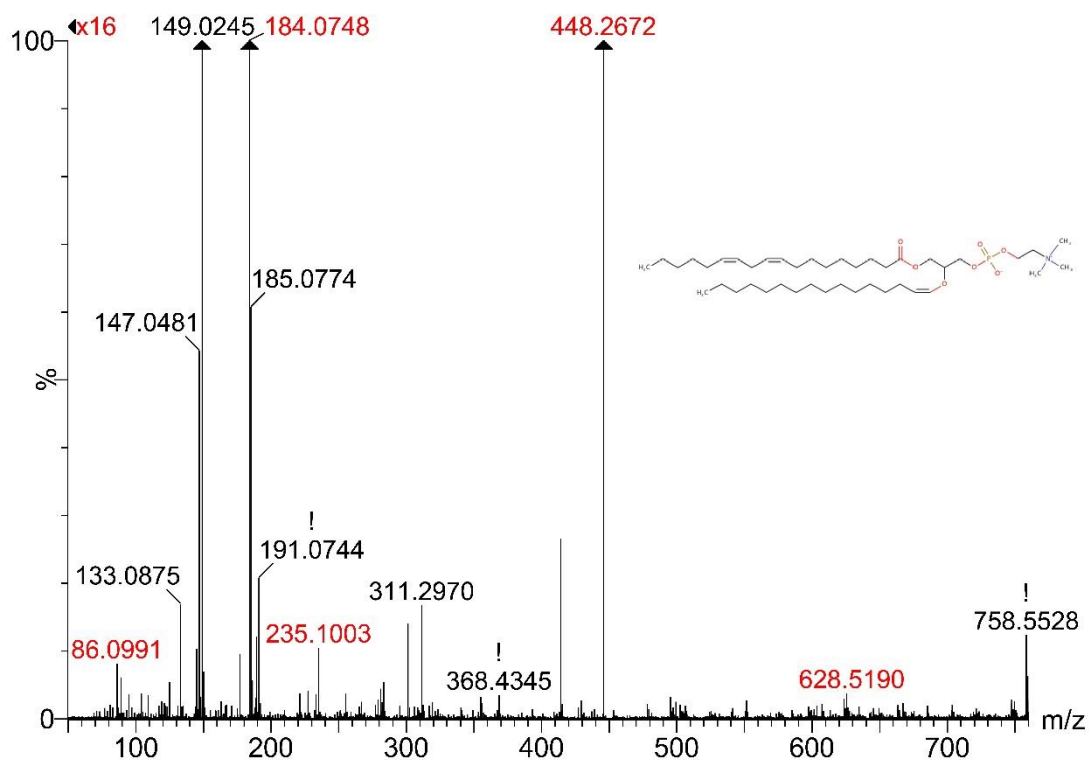

Figure S46. Identification Plot of Metabolite M26 with Mass Spectrum.

27.0\_760.5777

2: TOF MS ES+  
4.12e6

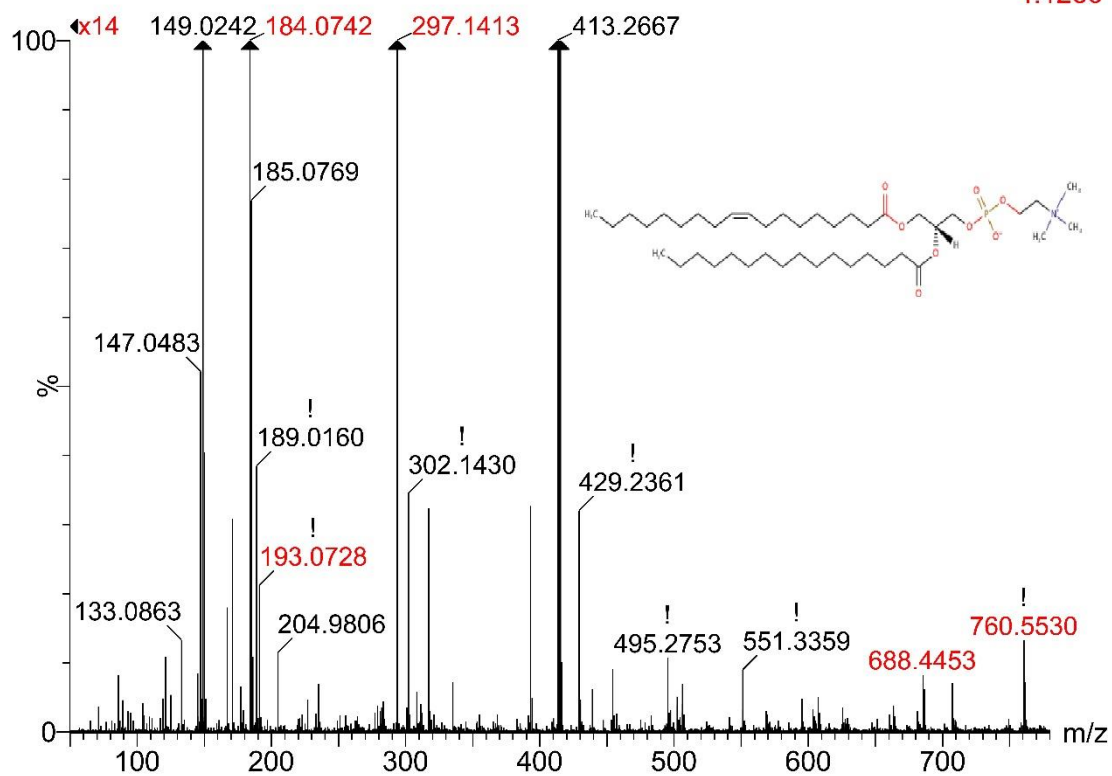

Figure S47. Identification Plot of Metabolite M27 with Mass Spectrum.

27.07\_788.6045

2: TOF MS ES+  
3.59e6

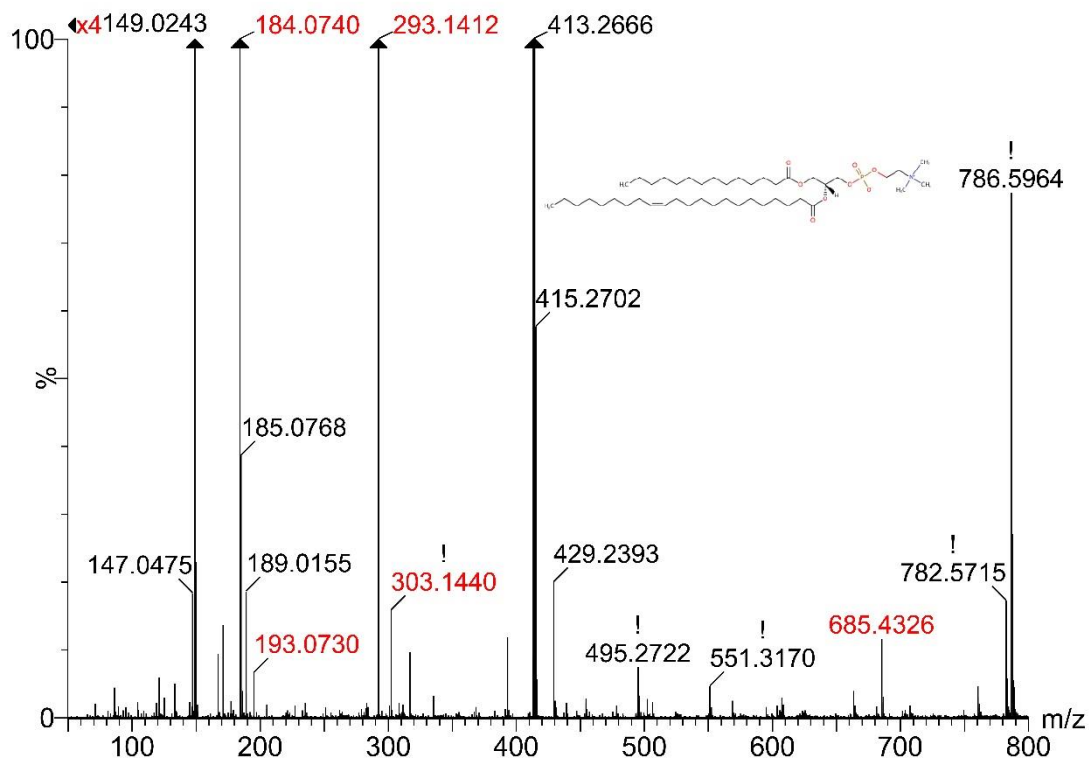

Figure S48. Identification Plot of Metabolite M28 with Mass Spectrum.

27.1\_798.5850

2: TOF MS ES+  
2.79e6

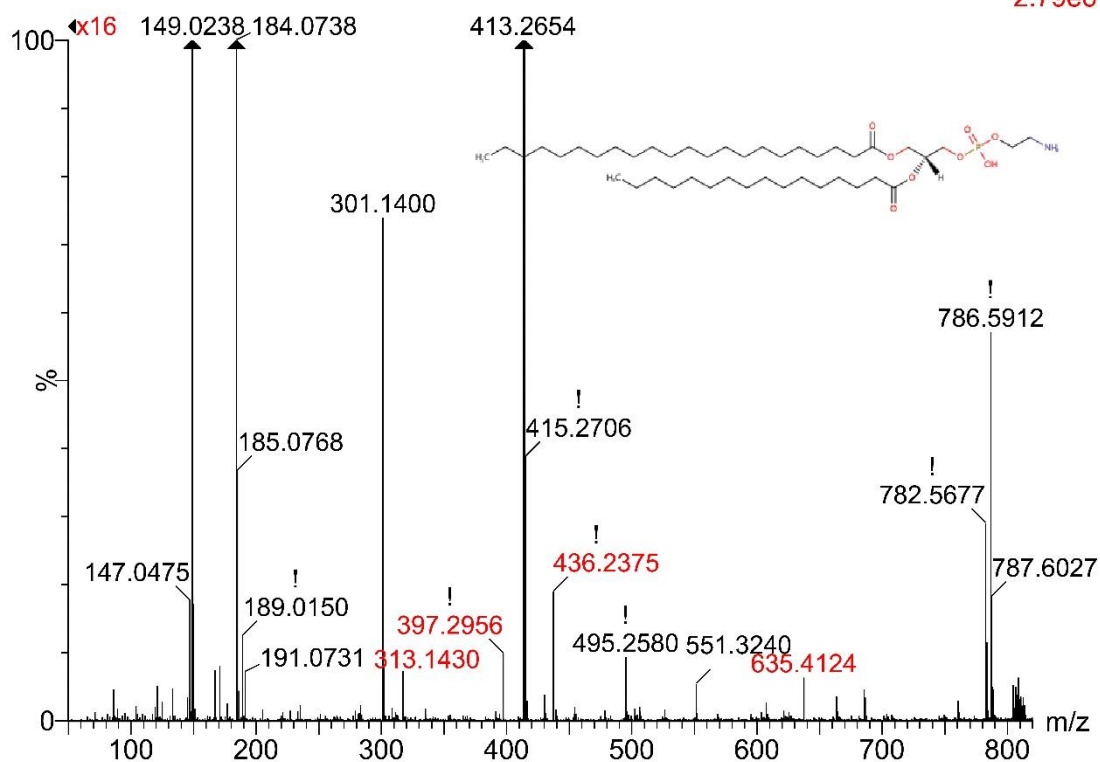

Figure S49. Identification Plot of Metabolite M29 with Mass Spectrum.



27.315\_703.5725

2: TOF MS ES+  
9.86e5

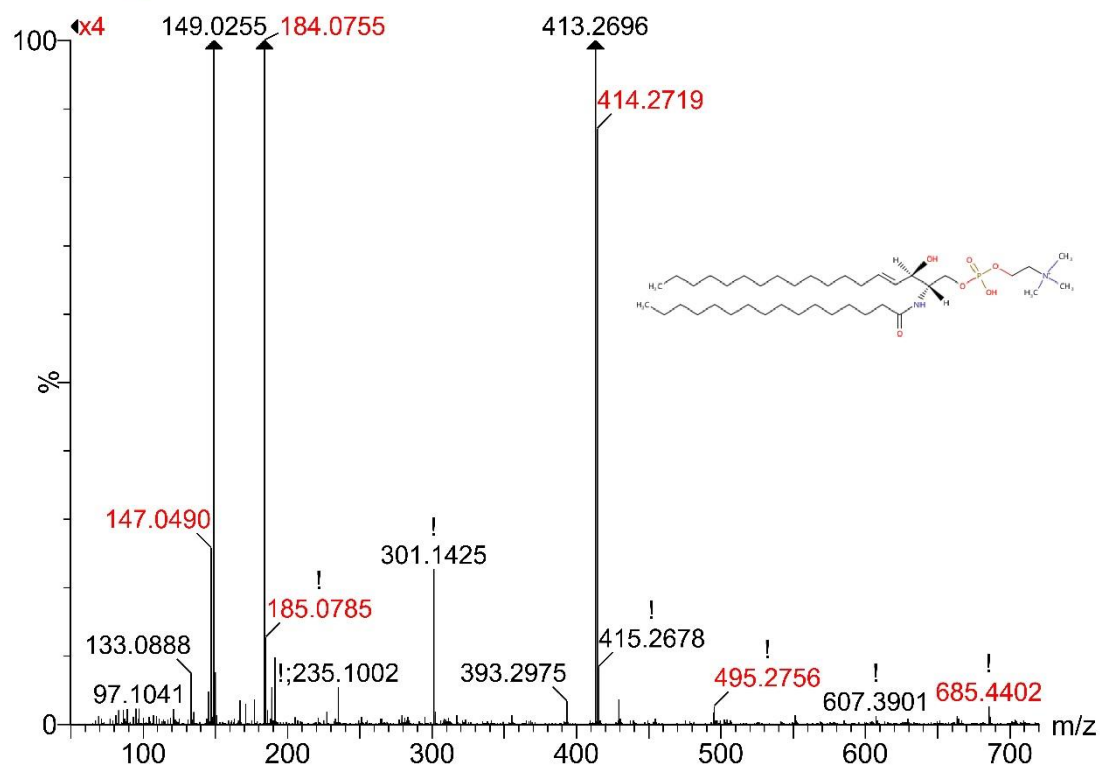

Figure S50. Identification Plot of Metabolite M30 with Mass Spectrum.

27.5\_782.5662

2: TOF MS ES+  
7.00e5

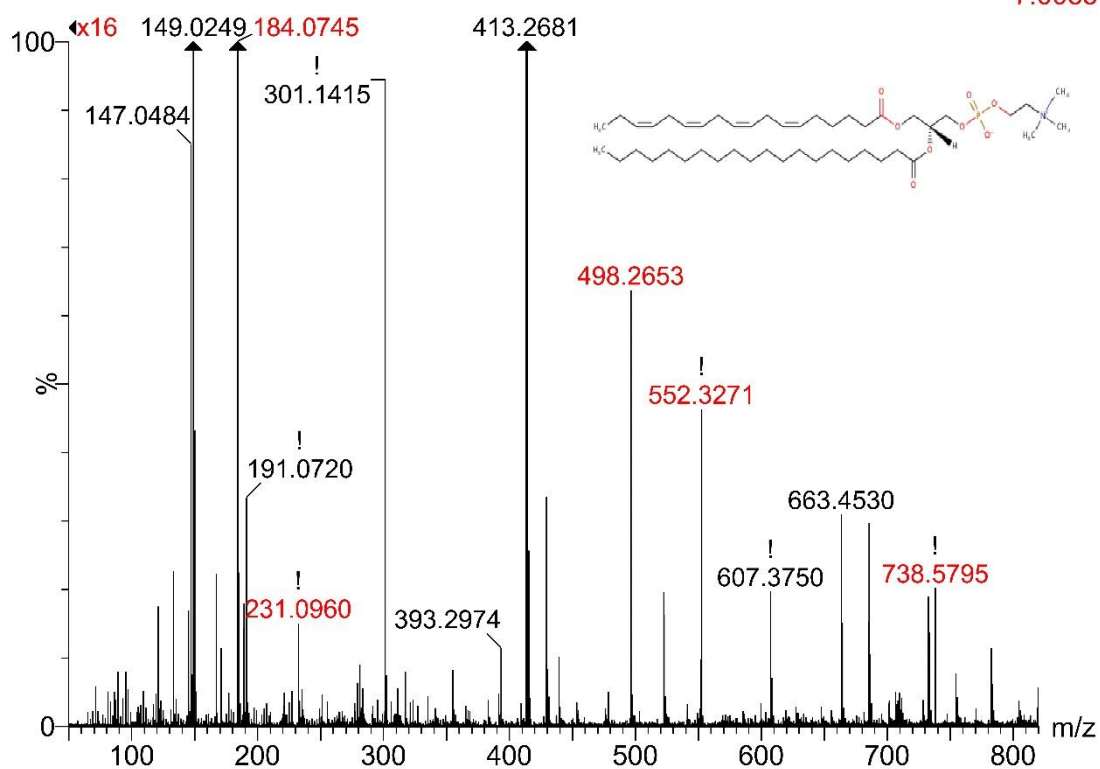

Figure S51. Identification Plot of Metabolite M31 with Mass Spectrum.

27.7\_732.5517

2: TOF MS ES+  
5.56e5

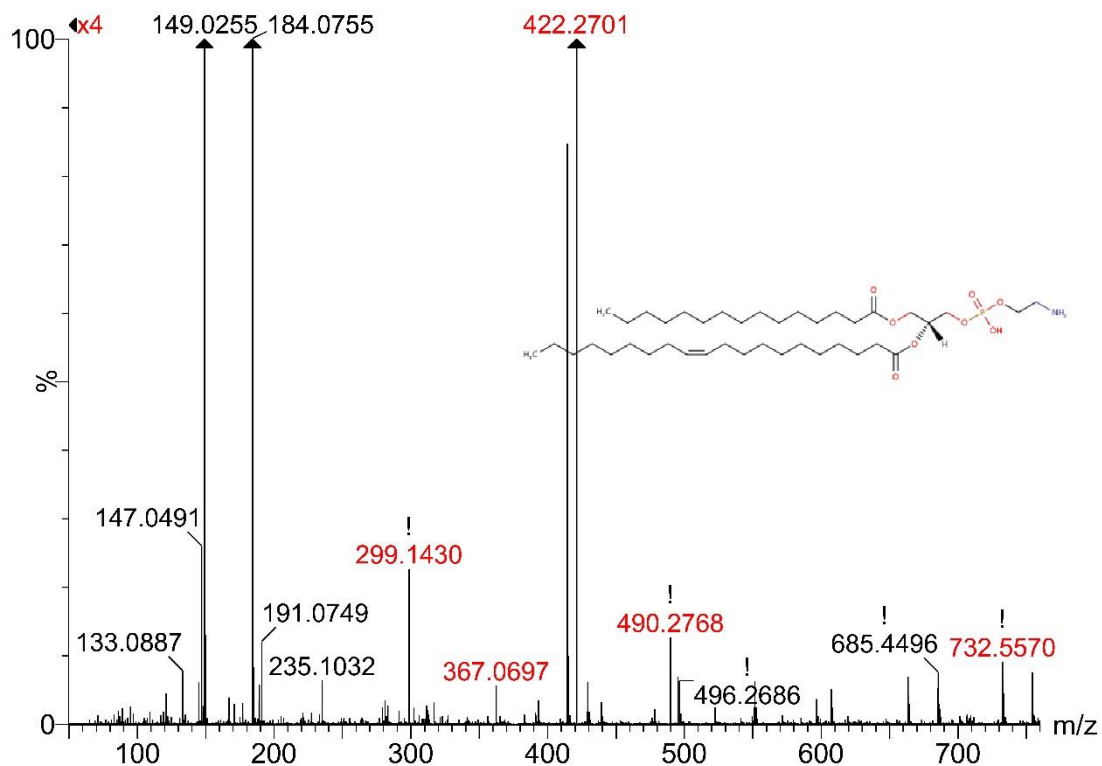

Figure S52. Identification Plot of Metabolite M32 with Mass Spectrum.

28.6\_349.2344

2: TOF MS ES+  
1.38e5

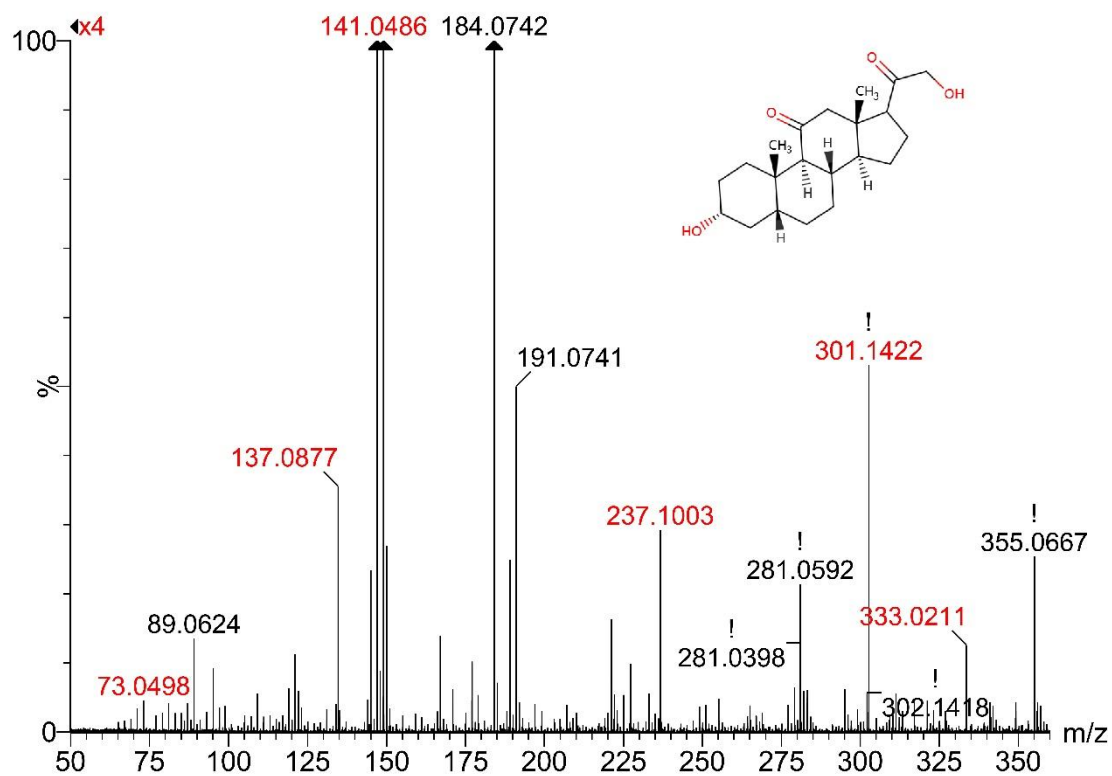

Figure S53. Identification Plot of Metabolite M33 with Mass Spectrum.

28.77\_425.3410

2: TOF MS ES+  
3.14e5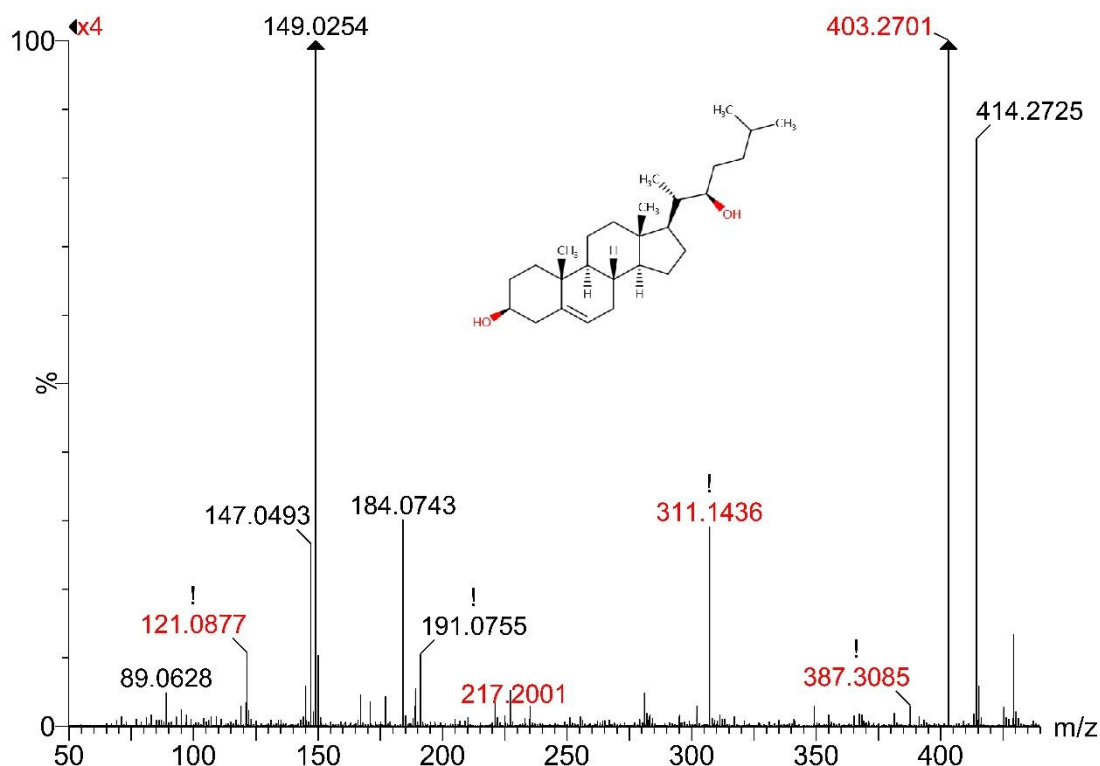

Figure S54. Identification Plot of Metabolite M34 with Mass Spectrum.

Table S14. The Metabolic Prediction Result (in Part) of the Microbiota in NEA Based on PICRUSt

| KO ID  | Description of Function                                | p value (NDR vs. NEA) |
|--------|--------------------------------------------------------|-----------------------|
| K07570 | general stress protein 13                              | 0.000193887           |
| K16619 | phospholipase C / alpha-toxin                          | 0.000211194           |
| K11635 | putative ABC transport system ATP-binding protein      | 0.00053108            |
| K05739 | uncharacterized protein                                | 0.000576456           |
| K13275 | major intracellular serine protease                    | 0.000653228           |
| K14439 | SWI/SNF-related matrix-associated actin-dependent      | 0.000653402           |
| K13815 | two-component system, response regulator RpfG          | 0.000718875           |
| K09681 | LysR family transcriptional regulator, transcription   | 0.000781819           |
| K06979 | macrolide phosphotransferase                           | 0.00079561            |
| K08168 | MFS transporter, metal-tetracycline-proton antiporter  | 0.000930036           |
| K06344 | spore coat protein Z                                   | 0.001022808           |
| K17737 | LysR family transcriptional regulator, carnitine       | 0.001077033           |
| K08152 | MFS transporter, DHA1 family, multidrug resistance     | 0.001154285           |
| K06414 | stage V sporulation protein M                          | 0.001287591           |
| K19005 | lipoteichoic acid synthase                             | 0.00153677            |
| K01942 | biotin---protein ligase                                | 0.001600332           |
| K00260 | glutamate dehydrogenase                                | 0.001657444           |
| K12268 | accessory secretory protein Asp1                       | 0.001757039           |
| K03489 | GntR family transcriptional regulator, transcriptional | 0.001762219           |

Supplementary Materials

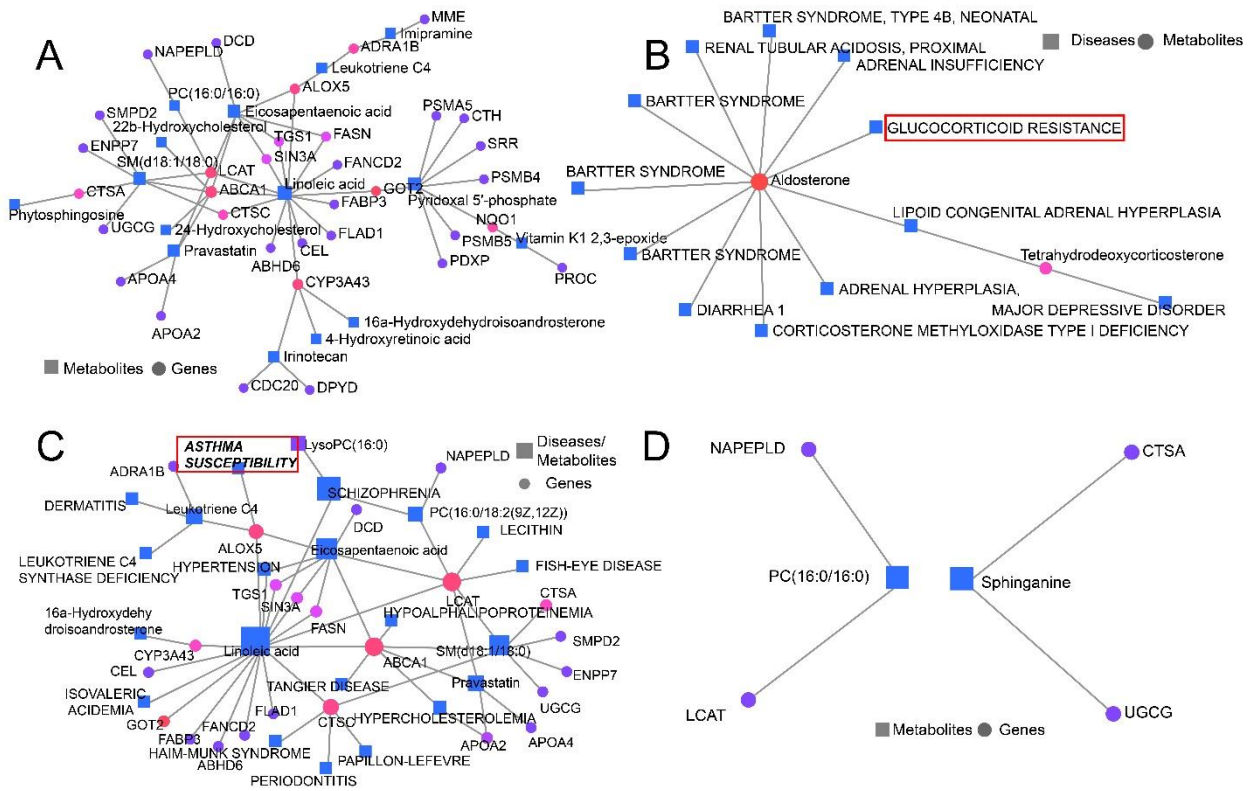

**Figure S55.** Results of interactions between differential predictive microbial genes and metabolites (A), between differential metabolites and the potential diseases (B), among differential metabolites, microbial predictive genes and the potential diseases (C) and between differential metabolites and microbial predictive genes in BALF (D) based on Network Explorer (samples from NEA groups). ABCA1: ATP-binding cassette transporter; ABHD6:  $\alpha/\beta$ -hydrolase domain-6; ADRA1B: adrenergic receptor  $\alpha$ -1B; ALOX5: Arachidonate 5-Lipoxygenase; APOA2: Apolipoprotein A2; APOA4: Apo- lipoprotein A4; CDC20: Cell Division Cycle 20; CEL: Carboxyl Ester Lipase; CTH: Cystathionase; CTSA: Cathepsin A; CTSC: Cathepsin C; CYP3A43: Cytochrome P450 Family 3 Subfamily A Member 43; DCD: Dermcidin; DPYD: Dihydropyrimidine Dehydrogenase; ENPP7: Ectonucleotide Pyrophosphatase /Phosphodiesterase 7; FABP3: Fatty Acid Binding Protein-3; FANCD2: Fanconi anemia complementation group D2; FASN: Fatty Acid Synthase; FLAD1: Flavin Adenine Dinucleoti-de-1; GOT2: Glutamic Oxaloacetic Transaminase-2; LCAT: Lecithin-Cholesterol Acyltransferase; MME: Membrane Metalloendopeptidase; NAPEPLD: N-acyl phosphatidylethanol- amine phospholipase D; NQO1: NAD(P)H Quinone Dehydrogenase 1; PDXP: Pyridoxal Phosphatase; PROC: Protein C, Inactivator Of Coagulation Factors Va and VIIIa; PSMA5: Proteasome Subunit  $\alpha$ 5; PSMB4: Proteasome Subunit  $\beta$ 4; PSMB5: Proteasome Subunit  $\beta$ 5; SIN3A: SIN3 Transcription Regulator Family Member A; SMPD2: Sphingomyelin Phosphodiesterase 2; SRR: Serine Racemase; TGS1: Trimethylguanosine Synthase 1; UGCG: UDP-Glucose Ceramide Glucosyltransferase.

Supplementary Materials

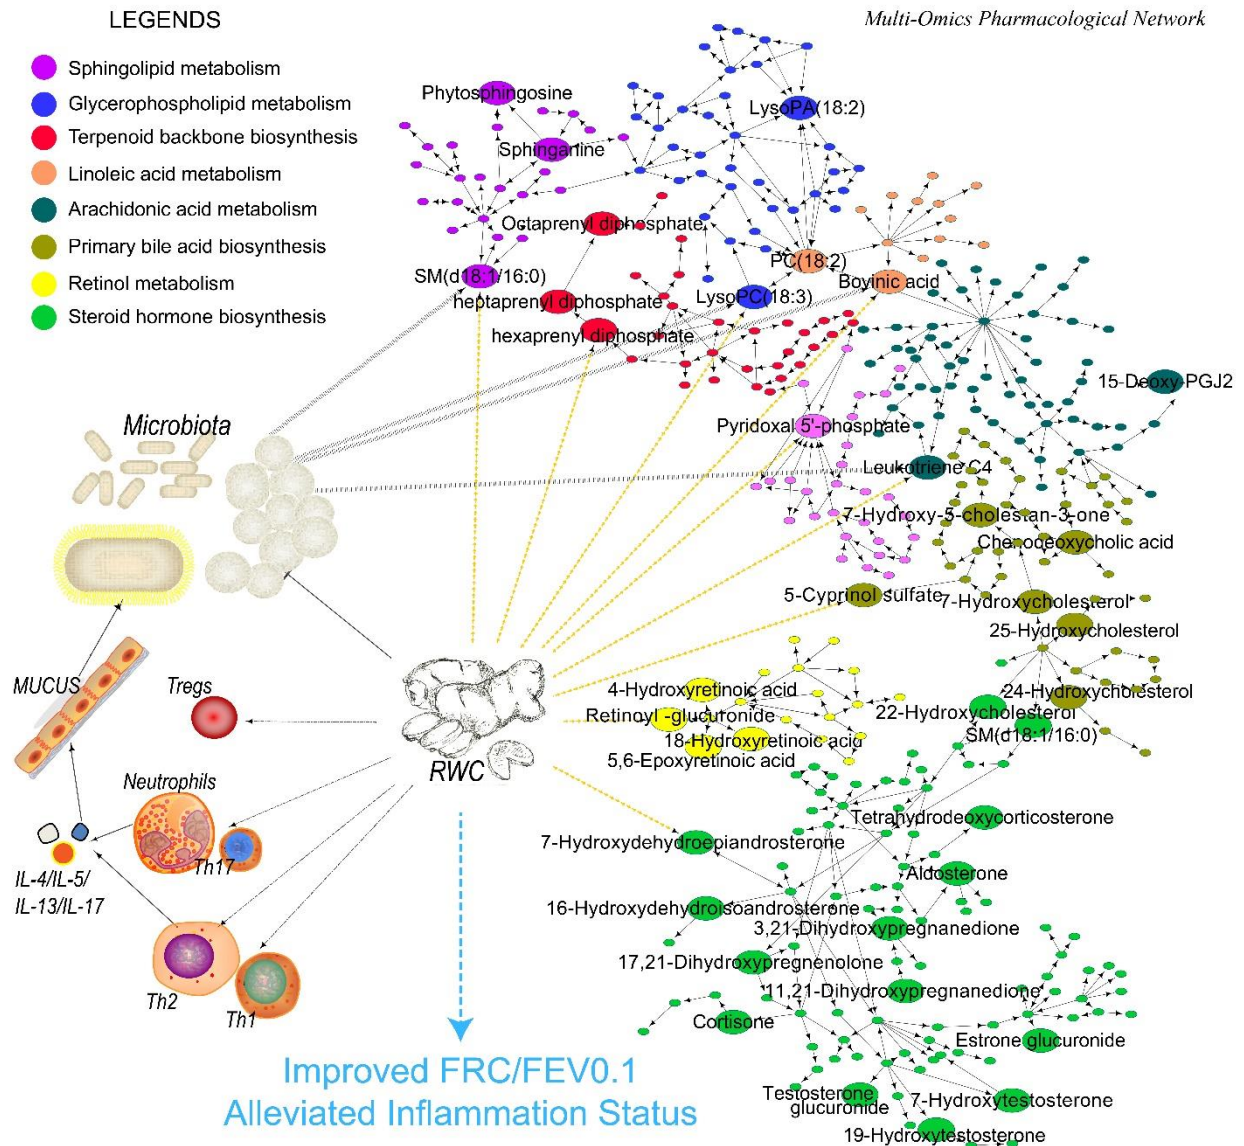

**Figure S56.** Network on the pathogenesis of asthma and the pharmacological mechanism of RWC based on present series of multi-omics studies.

**Table S15.** The ARRIVE Guidelines Checklist Animal Research: Reporting In Vivo Experiments

(Attached at the next page)



# The ARRIVE Guidelines Checklist

## Animal Research: Reporting In Vivo Experiments

Carol Kilkenny<sup>1</sup>, William J Browne<sup>2</sup>, Innes C Cuthill<sup>3</sup>, Michael Emerson<sup>4</sup> and Douglas G Altman<sup>5</sup>

<sup>1</sup>The National Centre for the Replacement, Refinement and Reduction of Animals in Research, London, UK, <sup>2</sup>School of Veterinary Science, University of Bristol, Bristol, UK, <sup>3</sup>School of Biological Sciences, University of Bristol, Bristol, UK, <sup>4</sup>National Heart and Lung Institute, Imperial College London, UK, <sup>5</sup>Centre for Statistics in Medicine, University of Oxford, Oxford, UK.

|                         | ITEM | RECOMMENDATION                                                                                                                                                                                                                                                                                                                                                                                                                                                                                                                                                                                                       | Section/<br>Paragraph |
|-------------------------|------|----------------------------------------------------------------------------------------------------------------------------------------------------------------------------------------------------------------------------------------------------------------------------------------------------------------------------------------------------------------------------------------------------------------------------------------------------------------------------------------------------------------------------------------------------------------------------------------------------------------------|-----------------------|
| Title                   | 1    | Provide as accurate and concise a description of the content of the article as possible.                                                                                                                                                                                                                                                                                                                                                                                                                                                                                                                             |                       |
| Abstract                | 2    | Provide an accurate summary of the background, research objectives, including details of the species or strain of animal used, key methods, principal findings and conclusions of the study.                                                                                                                                                                                                                                                                                                                                                                                                                         |                       |
| <b>INTRODUCTION</b>     |      |                                                                                                                                                                                                                                                                                                                                                                                                                                                                                                                                                                                                                      |                       |
| Background              | 3    | <p>a. Include sufficient scientific background (including relevant references to previous work) to understand the motivation and context for the study, and explain the experimental approach and rationale.</p> <p>b. Explain how and why the animal species and model being used can address the scientific objectives and, where appropriate, the study's relevance to human biology.</p>                                                                                                                                                                                                                         |                       |
| Objectives              | 4    | Clearly describe the primary and any secondary objectives of the study, or specific hypotheses being tested.                                                                                                                                                                                                                                                                                                                                                                                                                                                                                                         |                       |
| <b>METHODS</b>          |      |                                                                                                                                                                                                                                                                                                                                                                                                                                                                                                                                                                                                                      |                       |
| Ethical statement       | 5    | Indicate the nature of the ethical review permissions, relevant licences (e.g. Animal [Scientific Procedures] Act 1986), and national or institutional guidelines for the care and use of animals, that cover the research.                                                                                                                                                                                                                                                                                                                                                                                          |                       |
| Study design            | 6    | <p>For each experiment, give brief details of the study design including:</p> <p>a. The number of experimental and control groups.</p> <p>b. Any steps taken to minimise the effects of subjective bias when allocating animals to treatment (e.g. randomisation procedure) and when assessing results (e.g. if done, describe who was blinded and when).</p> <p>c. The experimental unit (e.g. a single animal, group or cage of animals).</p> <p>A time-line diagram or flow chart can be useful to illustrate how complex study designs were carried out.</p>                                                     |                       |
| Experimental procedures | 7    | <p>For each experiment and each experimental group, including controls, provide precise details of all procedures carried out. For example:</p> <p>a. How (e.g. drug formulation and dose, site and route of administration, anaesthesia and analgesia used [including monitoring], surgical procedure, method of euthanasia). Provide details of any specialist equipment used, including supplier(s).</p> <p>b. When (e.g. time of day).</p> <p>c. Where (e.g. home cage, laboratory, water maze).</p> <p>d. Why (e.g. rationale for choice of specific anaesthetic, route of administration, drug dose used).</p> |                       |
| Experimental animals    | 8    | <p>a. Provide details of the animals used, including species, strain, sex, developmental stage (e.g. mean or median age plus age range) and weight (e.g. mean or median weight plus weight range).</p> <p>b. Provide further relevant information such as the source of animals, international strain nomenclature, genetic modification status (e.g. knock-out or transgenic), genotype, health/immune status, drug or test naïve, previous procedures, etc.</p>                                                                                                                                                    |                       |



|                                           |    |                                                                                                                                                                                                                                                                                                                                                                                                                                                                                                                 |
|-------------------------------------------|----|-----------------------------------------------------------------------------------------------------------------------------------------------------------------------------------------------------------------------------------------------------------------------------------------------------------------------------------------------------------------------------------------------------------------------------------------------------------------------------------------------------------------|
| Housing and husbandry                     | 9  | Provide details of:<br>a. Housing (type of facility e.g. specific pathogen free [SPF]; type of cage or housing; bedding material; number of cage companions; tank shape and material etc. for fish).<br>b. Husbandry conditions (e.g. breeding programme, light/dark cycle, temperature, quality of water etc for fish, type of food, access to food and water, environmental enrichment).<br>c. Welfare-related assessments and interventions that were carried out prior to, during, or after the experiment. |
| Sample size                               | 10 | a. Specify the total number of animals used in each experiment, and the number of animals in each experimental group.<br>b. Explain how the number of animals was arrived at. Provide details of any sample size calculation used.<br>c. Indicate the number of independent replications of each experiment, if relevant.                                                                                                                                                                                       |
| Allocating animals to experimental groups | 11 | a. Give full details of how animals were allocated to experimental groups, including randomisation or matching if done.<br>b. Describe the order in which the animals in the different experimental groups were treated and assessed.                                                                                                                                                                                                                                                                           |
| Experimental outcomes                     | 12 | Clearly define the primary and secondary experimental outcomes assessed (e.g. cell death, molecular markers, behavioural changes).                                                                                                                                                                                                                                                                                                                                                                              |
| Statistical methods                       | 13 | a. Provide details of the statistical methods used for each analysis.<br>b. Specify the unit of analysis for each dataset (e.g. single animal, group of animals, single neuron).<br>c. Describe any methods used to assess whether the data met the assumptions of the statistical approach.                                                                                                                                                                                                                    |
| <b>RESULTS</b>                            |    |                                                                                                                                                                                                                                                                                                                                                                                                                                                                                                                 |
| Baseline data                             | 14 | For each experimental group, report relevant characteristics and health status of animals (e.g. weight, microbiological status, and drug or test naïve) prior to treatment or testing. (This information can often be tabulated).                                                                                                                                                                                                                                                                               |
| Numbers analysed                          | 15 | a. Report the number of animals in each group included in each analysis. Report absolute numbers (e.g. 10/20, not 50% <sup>2</sup> ).<br>b. If any animals or data were not included in the analysis, explain why.                                                                                                                                                                                                                                                                                              |
| Outcomes and estimation                   | 16 | Report the results for each analysis carried out, with a measure of precision (e.g. standard error or confidence interval).                                                                                                                                                                                                                                                                                                                                                                                     |
| Adverse events                            | 17 | a. Give details of all important adverse events in each experimental group.<br>b. Describe any modifications to the experimental protocols made to reduce adverse events.                                                                                                                                                                                                                                                                                                                                       |
| <b>DISCUSSION</b>                         |    |                                                                                                                                                                                                                                                                                                                                                                                                                                                                                                                 |
| Interpretation/scientific implications    | 18 | a. Interpret the results, taking into account the study objectives and hypotheses, current theory and other relevant studies in the literature.<br>b. Comment on the study limitations including any potential sources of bias, any limitations of the animal model, and the imprecision associated with the results <sup>2</sup> .<br>c. Describe any implications of your experimental methods or findings for the replacement, refinement or reduction (the 3Rs) of the use of animals in research.          |
| Generalisability/translation              | 19 | Comment on whether, and how, the findings of this study are likely to translate to other species or systems, including any relevance to human biology.                                                                                                                                                                                                                                                                                                                                                          |
| Funding                                   | 20 | List all funding sources (including grant number) and the role of the funder(s) in the study.                                                                                                                                                                                                                                                                                                                                                                                                                   |

References:

1. Kilkeny C, Browne WJ, Cuthill IC, Emerson M, Altman DG (2010) Improving Bioscience Research Reporting: The ARRIVE Guidelines for Reporting Animal Research. *PLoS Biol* 8(6): e1000412. doi:10.1371/journal.pbio.1000412
2. Schulz KF, Altman DG, Moher D, the CONSORT Group (2010) CONSORT 2010 Statement: updated guidelines for reporting parallel group randomised trials. *BMJ* 340:c332.
